1 **Cardiomyocyte PGC-1 $\alpha$  enables physiological adaptations to endurance exercise**  
2 **through suppression of GDF15 and cardiac atrophy**

3  
4 Sumeet A. Khetarpal<sup>1-3</sup>; Haobo Li<sup>4</sup>; Tevis Vitale<sup>2,3</sup>; James Rhee<sup>1,4</sup>; Louisa Grauvogel<sup>2,3</sup>;  
5 Claire Castro<sup>1</sup>; Melanie J. Mittenbühler<sup>2,3</sup>; Nicholas E. Houstis<sup>1</sup>; Ariana Vargas-Castillo<sup>2,3</sup>;  
6 Amanda L. Smythers<sup>2,3</sup>; Jing Liu<sup>5</sup>; Casie Curtin<sup>5</sup>; Hans-Georg Sprenger<sup>2,3</sup>; Katherine A.  
7 Blackmore<sup>2,3</sup>; Alexandra Kuznetsov<sup>1</sup>; Rebecca Freeman<sup>1</sup>; Dina Bogoslavski<sup>2,3</sup>; Patrick T.  
8 Ellinor<sup>1,6</sup>; Aarti Asnani<sup>5</sup>; Phillip A. Dumesic<sup>2,3</sup>; Pere Puigserver<sup>2,3</sup>; Jason D. Roh<sup>1</sup>; Bruce  
9 M. Spiegelman<sup>2,3\*</sup>; Anthony Rosenzweig<sup>1,7\*</sup>

10  
11 **Affiliations**

- 12  
13 1. Corrigan Minehan Heart Center and Cardiovascular Research Center,  
14 Massachusetts General Hospital, Boston, MA, USA  
15 2. Department of Cancer Biology, Dana Farber Cancer Institute, Boston, MA, USA  
16 3. Department of Cell Biology, Harvard Medical School, Boston, MA, USA  
17 4. Department of Anesthesia, Critical Care, and Pain Medicine, Massachusetts  
18 General Hospital, Boston, MA, USA  
19 5. CardioVascular Institute, Beth Israel Deaconess Medical Center, Boston, MA, USA  
20 6. Cardiovascular Disease Initiative, the Broad Institute of Harvard and MIT  
21 7. Institute for Heart and Brain Health, University of Michigan, Ann Arbor, MI, USA

22  
23 \*Co-senior/co-corresponding authors

24  
25 **Correspondence**

26  
27 Anthony Rosenzweig, MD, Institute for Heart and Brain Health, University of Michigan;  
28 Email: [anthros@med.umich.edu](mailto:anthros@med.umich.edu)

29  
30 Bruce M. Spiegelman, PhD, Department of Cancer Biology, Dana Farber Cancer Institute;  
31 Department of Cell Biology, Harvard Medical School;  
32 Email: [bruce\\_spiegelman@dfci.harvard.edu](mailto:bruce_spiegelman@dfci.harvard.edu)

47 **Summary**

48  
49 Exercise training induces physiological cardiac hypertrophy, enhanced mitochondrial  
50 biogenesis and myocardial contractility. In skeletal muscle, the transcriptional coactivator  
51 PGC-1 $\alpha$  is a key orchestrator of these responses. The heart expresses abundant and  
52 exercise-responsive PGC-1 $\alpha$ , but it is unclear whether cardiomyocyte PGC-1 $\alpha$  is  
53 necessary for cardiac adaptation to endurance training. Here we demonstrate that  
54 cardiomyocyte PGC-1 $\alpha$  is required for physiological cardiac hypertrophy during exercise  
55 training in mice. In the absence of cardiomyocyte PGC-1 $\alpha$ , voluntary wheel running does  
56 not improve exercise capacity and instead confers immune-fibrotic-atrophic heart failure  
57 after just 6 weeks of training. We identify cardiomyocyte PGC-1 $\alpha$  as a negative regulator  
58 of stress-responsive senescence gene expression. The most enriched of these is the  
59 myomitokine GDF15. GDF15 is secreted locally but not systemically in PGC-1 $\alpha$ -deficient  
60 mouse hearts and reduces cardiomyocyte size. Cardiomyocyte-specific reduction of  
61 GDF15 expression preserves exercise tolerance and cardiac contractility in PGC-1 $\alpha$ -  
62 deficient mice during endurance training. Finally, we show that cardiomyocyte  
63 *PPARGC1A* expression correlates with cardiomyocyte number and negatively with  
64 GDF15 expression in human cardiomyopathies through single nucleus RNA sequencing.  
65 Our data implicate cardiomyocyte PGC-1 $\alpha$  as a vital safeguard against stress-induced  
66 atrophy and local GDF15-induced dysfunction during exercise.

67  
68  
69  
70  
71  
72  
73  
74  
75  
76  
77  
78  
79  
80  
81  
82  
83  
84  
85  
86  
87  
88  
89

90 **Key words:** Exercise; Endurance training; Peroxisome proliferator activated receptor  
91 coactivator 1 alpha (PGC-1 $\alpha$ ); Growth differentiation factor 15 (GDF15); Cardiac atrophy;  
92 Cardiac fibrosis; Senescence associated secretory phenotype (SASP).

## 93 Introduction

94

95 Endurance exercise confers remarkable protection from the incidence and adverse  
96 sequelae of cardio-metabolic and other chronic diseases<sup>1-4</sup>. Endurance training induces  
97 myriad adaptations including intra- and inter-organ communication through protein  
98 secretion, mitochondrial function, detoxification of circulating compounds, and local and  
99 systemic inflammatory modulation<sup>5-9</sup>.

100

101 Response to endurance training is best understood in the muscle. Here exercise training  
102 induces multiple adaptations including mitochondrial biogenesis, myokine protein and  
103 metabolite secretion, muscle hypertrophy and others<sup>10</sup>. A vital orchestrator of these  
104 responses is the transcriptional co-activator peroxisome proliferator activated receptor 1 $\alpha$   
105 (PGC-1 $\alpha$ )<sup>11,12</sup>. Tissue-specific gain- and loss-of-function studies have established its  
106 necessity and sufficiency for the optimal training response<sup>13,14</sup>. The heart is a  
107 mitochondrial- and PGC-1 $\alpha$ -rich muscle that must also adapt to exercise training. The  
108 role of PGC-1 $\alpha$  in mitochondrial biogenesis and oxidative metabolism in the heart has  
109 been described in studies of disease models in mice lacking PGC-1 $\alpha$  globally<sup>10,11,14-16</sup>.  
110 However, whether cardiomyocyte PGC-1 $\alpha$  is needed for benefits in the adaptive stress of  
111 endurance exercise training is unclear.

112

113 Here, we investigated the role of cardiomyocyte PGC-1 $\alpha$  in acute exercise and endurance  
114 training through genetic loss-of-function in mice. We find that cardiomyocyte PGC-1 $\alpha$  is  
115 required for the beneficial cardiac response to exercise training in mice. Its absence  
116 causes exercise-induced immune fibrotic heart failure, cardiac atrophy and accelerated  
117 age-related myocardial gene expression including local induction of the myomitokine  
118 GDF15. Silencing cardiomyocyte GDF15 mitigates heart failure and exercise intolerance  
119 in vivo.

120

## 121 Results

122

### 123 *Cardiomyocyte PGC-1 $\alpha$ is required to adapt to endurance training in mice*

124

125 To investigate whether cardiomyocyte PGC-1 $\alpha$  is required for exercise tolerance, we  
126 studied young adult (12-week-old) male WT and cardiomyocyte PGC-1 $\alpha$ -deficient (KO)  
127 mice. Consistent with prior studies of these mice, sedentary KO mice (KO\_Sed)  
128 demonstrated normal heart dimensions and contractility at rest by echocardiography  
129 (**Figure 1A**)<sup>16</sup>. They did exhibit a ~13% reduction in resting heart rate compared to the  
130 WT sedentary (WT\_Sed) group (**Figure 1A**). While cardiomyocyte PGC-1 $\alpha$  deficiency did  
131 not impair resting contractility, we observed that heart *Ppargc1a* gene expression  
132 increased acutely 4-5 fold in the heart within 30 minutes of exhaustive treadmill exercise  
133 in WT mice (**Figure S1**). We thus tested acute exhaustive treadmill exercise tolerance in  
134 WT and KO mice. Sedentary KO mice demonstrated similar work capacity at maximum  
135 effort as wild-type littermates, though they achieved approximately 12% less maximum  
136 speed ( $p < 0.0001$ ) and 15% less maximum distance ran at exhaustion ( $p < 0.001$ ) (**Figure**  
137 **1B**). Despite modest reduction in peak exercise tolerance, KO mice demonstrated a 25%  
138 decrease in their contractility measured as fractional shortening (FS) at peak stress

139 compared to WT mice (decreased contractile reserve), which expectedly augmented their  
140 FS with exercise ( $p < 0.0001$ , **Figure 1C-D**).

141  
142 We hypothesized that endurance training could augment exercise capacity in cardiac  
143 PGC-1 $\alpha$ -deficient mice. This was based on inference from models of PGC-1 $\alpha$ -deficiency  
144 in other tissues<sup>13,18</sup>. Additionally, we previously showed that endurance training in mice  
145 induced as many as 175 transcriptional programs associated with physiological cardiac  
146 hypertrophy, suggesting many potential programs aside from PGC-1 $\alpha$  that could confer  
147 exercise adaptation<sup>19</sup>. To test this, we trained 12-week-old WT and KO mice through  
148 voluntary wheel running for up to 8 weeks. We assessed exercise tolerance by treadmill  
149 testing prior to and at 6 weeks of voluntary wheel running. WT and KO mice voluntarily  
150 ran comparable distances over the training period (**Figure 1E**). After 6 weeks of training,  
151 WT mice (WT\_Ex) demonstrated a ~50% increase in their exercise tolerance during  
152 treadmill testing, but KO mice failed to demonstrate any improvement (**Figure 1F**).  
153 Surprisingly, KO mice after exercise training (KO\_Ex) now demonstrated a ~53%  
154 reduction in resting FS ( $p < 0.001$ , **Figure 1G-H**) and dilation of the left ventricle with a  
155 ~46% increase in left ventricular cavity size ( $p < 0.05$ , **Figure 1G-H**).

156  
157 *Immune-fibrotic heart failure in exercise-trained cardiomyocyte PGC-1 $\alpha$  deficiency*

158  
159 We explored the unexpected quick onset of contractile dysfunction with exercise training  
160 in the KO\_Ex mice. At 8 weeks of training, these mice demonstrated systemic features of  
161 heart failure. This included increased heart and lung weight (**Figure 2A**) and pathologic  
162 cardiac gene expression (Nppb, Myh7 to Myh6 ratio; **Figure 2B**). The KO\_Ex mice also  
163 demonstrated reduced inguinal white adipose tissue (iWAT) and gastrocnemius weights  
164 and increased iWAT oxidative gene expression, consistent with early systemic wasting  
165 (**Figure S2**). Given PGC-1 $\alpha$ 's known central role in promoting mitochondrial biogenesis<sup>20</sup>,  
166 we quantified relative heart mitochondrial mass by measuring the relative amount of  
167 mtDNA to nuclear DNA in the hearts of our mice. WT\_Ex mice demonstrated increased  
168 relative mtDNA relative to WT\_Sed mice whereas KO\_Ex mice showed no increase  
169 (**Figure 2C**). RNA sequencing revealed a strong geneset enrichment<sup>21,22</sup> of hallmark  
170 genes comprising mitochondrial oxidative phosphorylation (OXPHOS<sup>23</sup>) in WT mice after  
171 endurance training. In the KO mice there was a relative depletion of this same geneset  
172 after exercise training (**Figure 2D-E**). Comparing heart transcriptomes of sedentary and  
173 exercise trained mice, KO mice demonstrated increased representation<sup>24</sup> of genes  
174 important in cell cycle progression and decreased expression of genes related to calcium  
175 ion transport particularly in the sedentary state. After exercise training, KO mice  
176 demonstrated increased expression of genes involved in immunocyte chemotaxis, protein  
177 secretion and extracellular matrix deposition and a relative deficiency in oxidative gene  
178 expression (**Figure 2F-G**). Cell type estimation from RNA seq data using murine and  
179 human immunocyte marker-based deconvolution suggested an enrichment for  
180 macrophages in the KO\_Ex hearts (**Figure 2G and Figure S3A-B**). KO\_Ex hearts  
181 showed increased pro-inflammatory CD68+ monocyte/macrophage infiltration in their  
182 myocardium (**Figure 2H**). They also showed increased CD3+ cells consistent with an  
183 overall increase in cardiac inflammation (**Figure S3C**). KO\_Ex hearts contained  
184 increased collagen fibrosis measured by Picrosirius Red staining (**Figure 2I**) and

185 increased pro-fibrotic protein expression including TGF $\beta$  and periostin (**Figure S3D**).  
186 These findings imply the development of immune-fibrotic heart failure in the KO mice after  
187 exercise training.

188  
189 To further investigate the mechanism of exercise-induced dysfunction in the KO\_Ex mice,  
190 we studied neonatal rat ventricular myocytes (NRVMs) in culture<sup>25</sup>. Adenoviral  
191 overexpression of PGC-1 $\alpha$  increased transcript levels ~6-fold and reduced stress-related  
192 gene expression (Nppa, Nppb, Myh7/Myh6) (**Figure 2J**). siRNA mediated PGC-1 $\alpha$   
193 knockdown reduced PGC-1 $\alpha$  expression by ~60% and increased pathological gene  
194 expression. To model exercise-induced physiological hypertrophy of cardiomyocytes, we  
195 stimulated the NRVMs with insulin-like growth factor 1 (IGF1). This is a stimulator of  
196 phosphoinositol-3-kinase/Akt-mediated growth pathways in cardiomyocytes that are  
197 observed with endurance training. It also reduces stress-related pathologic gene  
198 expression in cardiomyocytes<sup>26,27</sup>. IGF1 failed to reduce stress-related gene expression  
199 with PGC-1 $\alpha$  knockdown (**Figure 2J**). Furthermore, intracellular ATP content increased  
200 with IGF1 and PGC-1 $\alpha$  overexpression but the combination of PGC-1 $\alpha$  silencing and  
201 IGF1 reduced ATP content by ~80% relative to control siRNA treated cardiomyocytes  
202 ( $p < 0.0001$ , **Figure 2K**) consistent with metabolic failure in the context of PGC-1 $\alpha$  loss-of-  
203 function and exercise induced energy stress.

204  
205 *Cardiomyocyte atrophy and increased SASP after exercise training in PGC-1 $\alpha$ -deficiency*  
206

207 A striking feature of histological staining of the hearts of the KO\_Ex mice was the relative  
208 loss of cardiomyocytes. PCM1 staining (nuclear marker of myocytes) showed a 25%  
209 reduction in PCM1+/DAPI+ cells suggesting a loss of cardiomyocytes ( $p < 0.001$ , **Figure**  
210 **3A**). Staining of a proliferation marker Ki67 also showed decreased Ki67+  
211 cardiomyocytes in the KO\_Ex hearts (67% decrease in KO\_Ex vs. WT\_Ex,  $p < 0.0001$ ,  
212 **Figure 3B**) with positive staining of noncardiomyocyte cells. KO\_Ex hearts also  
213 demonstrated smaller cardiomyocytes by wheat-germ agglutinin (WGA) staining relative  
214 to WT\_Ex counterparts (41% decrease,  $p < 0.0001$ , **Figure 3C**). The findings of loss of  
215 cardiomyocytes as well as reduced cardiomyocyte proliferation and size suggested that  
216 PGC-1 $\alpha$  was critical to protecting cardiomyocytes from atrophy in response to energetic  
217 stress related to exercise. While IGF1 promoted increased cardiomyocyte size as  
218 measured by sarcomeric  $\alpha$ -actinin staining of treated NRVMs in vitro, it failed to increase  
219 cardiomyocyte size in NRVMs treated with PGC-1 $\alpha$  siRNA relative to cells treated with  
220 PGC-1 $\alpha$  siRNA alone ( $p < 0.0001$ , **Figure S4A**).

221  
222 To identify the mechanisms of atrophy in the KO\_Ex hearts, we further studied their  
223 transcriptome. GSEA analysis of cell type signatures in sedentary and exercised KO vs  
224 WT mice also revealed that hearts from the KO mice demonstrated increased expression  
225 of genes related to aged cardiac cells (**Figure S4B**). Consistent with this, when we  
226 annotated all differentially expressed genes in the bulk sequenced transcriptomes and  
227 filtered by protein-coding genes encoding secreted proteins, there was an upregulation  
228 of genes constituting a program of negative regulation of tissue or cell growth (**Figure**  
229 **S4C**). Additionally, KO hearts demonstrated enriched expression of genes related to DNA

230 damage-induced senescence, a finding that was weakly present even before exercise  
231 training (**Figure S4D**).

232  
233 We found the KO hearts also enriched for the expression of senescence associated  
234 secretory phenotype genes<sup>28</sup> (SASP; **Figure 3D**), a set of genes encoding secreted  
235 proteins that negatively regulate cell growth through paracrine and endocrine means in  
236 response to aging and stress<sup>29–32</sup>. Notably, KO\_Sed mice already exhibited an  
237 upregulation of the SASP program (**Figure 3D**). We investigated individual genes that  
238 were upregulated in KO\_Sed and KO\_Ex hearts relative to their WT counterparts that  
239 comprised the SASP geneset (**Figure 3D**) and cell growth-related gene sets (**Figure**  
240 **S4C**). Among many known genes, one that was markedly upregulated (~13-fold) in the  
241 sedentary KO mice was growth differentiation factor 15 (GDF15; **Figure 3E**). GDF15 was  
242 indeed the most enriched gene in the entire differential transcriptomes of the KO\_Sed vs  
243 WT\_Sed mice and the KO\_Ex vs WT\_Ex mice. *Gdf15* expression increased with PGC-  
244 1 $\alpha$  siRNA treatment in NRVMs (**Figure S4E**). Conversely, muscle PGC-1 $\alpha$ -transgenic  
245 mice overexpressing PGC-1 $\alpha$  ~8-10 fold in skeletal muscle and ~3-4 fold in heart  
246 demonstrated a ~50% downregulation of heart *Gdf15* gene expression (**Figure S4F**).

247  
248 *Heart-derived GDF15 limits cardiac function in response to exercise training in*  
249 *cardiomyocyte PGC-1 $\alpha$  deficiency*

250  
251 Circulating GDF15 promotes energy expenditure in response to stress in several  
252 metabolic tissues through a central axis involving its receptor in the area postrema  
253 GFRAL<sup>33,34</sup>. To determine whether increased heart GDF15 expression in our model  
254 affected circulating levels, we measured plasma GDF15 using an ELISA. We found no  
255 difference in plasma GDF15 levels in sedentary, acutely-exercised or exercise trained  
256 WT vs. KO mice (**Figure 3F**). We next adopted a method previously developed to isolate  
257 muscle and fat extracellular fluid (EF) enriched for secreted myokines to the hearts of our  
258 mice<sup>35</sup> (**Figure 3F**). We observed a ~4.8-fold increase in GDF15 in heart EF of KO\_Ex  
259 mice ( $P < 0.0001$ , **Figure 3F**), mirroring the increase in *Gdf15* gene expression. This  
260 suggests an elevation of locally secreted but not systemic GDF15 from the heart with  
261 PGC-1 $\alpha$  cardiomyocyte deficiency.

262  
263 Aside from its systemic role, heart-derived GDF15 limits pathological cardiac hypertrophy  
264 in response to pressure overload<sup>36</sup>. We found that exogenous GDF15 prevented  
265 physiological cardiomyocyte hypertrophy in response to IGF1 in NRVMs in vitro (**Figure**  
266 **3G**). We thus hypothesized that early GDF15 upregulation and local secretion limited  
267 cardiac adaptation to exercise training in KO mice and that silencing cardiomyocyte *Gdf15*  
268 may prevent exercise-induced cardiac dysfunction. To test this, we developed a tool to  
269 silence cardiomyocyte *Gdf15* expression using an adeno-associated virus serotype 9  
270 (AAV9) vector expressing a short hairpin RNA (shRNA) against *Gdf15* to administer to  
271 mice in vivo via tail-vein injection. We expressed this AAV vector or one expressing a  
272 control scramble shRNA sequence in 8-week old WT or KO mice for one week and then  
273 subjected them to endurance training for 6 weeks. We measured contractile function and  
274 exercise capacity before and after exercise training (**Figure 3H**). AAV9-*Gdf15* shRNA  
275 reduced *Gdf15* expression in KO mouse hearts by ~78% relative to KOs treated with the

276 scramble shRNA by the end of exercise training (**Figure 3I**). KO mice expressing  
277 scramble shRNA demonstrated a 33% reduction in FS consistent with training induced  
278 cardiomyopathy (**Figure 3J**). Importantly, AAV-shGdf15 treated KOs retained their FS  
279 after training (51% pre-training vs 47% after 5 weeks,  $p=0.18$ ; **Figure 3J**). They also  
280 demonstrated preserved exercise tolerance measured as max distance run during a  
281 treadmill tolerance test (66% improvement,  $p<0.05$ , **Figure 3K**). These data suggest that  
282 heart-derived GDF15 is an important and targetable contributor to exercise-induced  
283 contractile dysfunction and limited exercise capacity in the absence of cardiomyocyte  
284 PGC-1 $\alpha$  function.

285

### 286 *PPARGC1A and GDF15 in cardiomyopathies*

287

288 The exercise-induced cardiomyocyte atrophy and heart failure in the absence of PGC-1 $\alpha$   
289 suggested that improvement of myocardial mitochondrial function with exercise is  
290 necessary to prevent a maladaptive response to energetic stress. We hypothesized that  
291 the relationship of PGC-1 $\alpha$  to the negative regulation of pathological protein secretion  
292 expression in other models may exist since downregulation of PGC-1 $\alpha$  has been seen in  
293 murine models of heart failure. We performed comparative transcriptomics of bulk heart  
294 RNA seq from our model of exercise-induced heart failure with PGC-1 $\alpha$  deficiency to that  
295 of PGC-1 $\alpha$ -deficient pregnant female murine hearts exhibiting peripartum  
296 cardiomyopathy and of WT mice after transverse aortic constriction (**Figure S5**). We  
297 specifically annotated protein-coding transcripts for secreted protein gene expression and  
298 found that among upregulated secreted protein transcripts, the 124 genes overlapping  
299 across all models encoded programs related to fibrosis and extracellular matrix deposition  
300 (**Figure S5B**). Interestingly, 65 genes upregulated in the two PGC-1 $\alpha$ -deficient heart  
301 failure mouse models (exercise and peripartum cardiomyopathy<sup>16</sup>) were enriched in  
302 programs related to immune cell chemotaxis (**Figure S5B**). Several components of the  
303 SASP were common to all 3 heart failure models, including GDF15 which was among the  
304 most highly upregulated across the 3 models (**Figure S5C**).

305

306 We next sought to extend this observation to human heart failure. In humans, germline  
307 deleterious variation in the PPARGC1A gene is poorly tolerated such that predicted loss-  
308 of-function (pLOF) variants are subjected to negative selection (gnomAD v4.0.0 server).  
309 We thus explored the relationship of cell-type resolved PPARGC1A expression in the  
310 hearts of humans with cardiomyopathies to investigate the relationship of PGC-1 $\alpha$   
311 function during myocardial energy stress to the observations from our murine model.  
312 Single nucleus RNA sequencing of 16 nonfailing, 11 dilated cardiomyopathy (DCM), and  
313 15 hypertrophic cardiomyopathy (HCM) hearts previously identified almost 600,000  
314 nuclei<sup>37</sup>. Using this study, we found that total PPARGC1A in the heart was predominantly  
315 expressed in the 3 different cardiomyocyte populations (**Figure 4A**). PPARGC1A  
316 cardiomyocyte expression was >28-fold higher than the next most expressing cell type  
317 which was vascular smooth muscle (VSMC). Comparing nonfailing (NF), DCM and HCM,  
318 PPARGC1A expression in cardiomyocytes was significantly reduced in both disease  
319 states, with ~32% reduction in HCM and ~38% reduction in DCM ( $p<0.0001$  for both  
320 compared to NF, Wilcoxon rank-sum test; **Figure 4B**). We correlated total cardiomyocyte  
321 PPARGC1A expression with LV mass measures, left ventricular ejection fraction (LVEF),

322 cardiomyocyte and macrophage frequency (**Figure 4C**). We found that cardiomyocyte  
323 PPARGC1A expression was correlated inversely with LV mass ( $p<0.05$ ) and positively  
324 with relative cardiomyocyte proportion in the heart ( $p<0.05$ ). A nonsignificant negative  
325 correlation was seen with macrophage proportion. Among cardiomyocytes expressing  
326 both genes, PPARGC1A and GDF15 were anti-correlated ( $p<0.05$ ; **Figure 4C**).  
327 Consistent with this, meta-analysis of bulk-tissue RNA seq<sup>38</sup> across tissues demonstrated  
328 a strong inverse correlation of PPARGC1A expression and GDF15 expression in the  
329 heart and muscle with weaker overall correlation across all tissues (**Figure S6**). Our data  
330 describes PGC-1 $\alpha$  as an important restraint against energy stress-induced GDF15  
331 expression and cardiomyocyte atrophy in the heart (**Figure 4D**).

## 332 333 **Discussion**

334  
335 Metabolic adaptation is a central component of tissue remodeling that confers many of  
336 the benefits of exercise<sup>11</sup>. PGC-1 $\alpha$  is a single molecular entity that coordinates many of  
337 the adaptive programs in response to exercise in muscle. Here it does so through  
338 increasing mitochondrial numbers and function, inducing expression of genes related to  
339 fiber type switching and contractility, augmenting muscle innervation, myokine secretion  
340 and many other mechanisms<sup>20</sup>. PGC-1 $\alpha$  increases with endurance training in the heart  
341 but the necessity of cardiomyocyte PGC-1 $\alpha$  to exercise training is unknown. Moreover,  
342 the role of PGC-1 $\alpha$  to established tenets of the endurance response from muscle  
343 (mitochondrial biogenesis, physiological hypertrophy, myokine secretion) in the heart has  
344 been unclear. Our study sought to address these and ascribe functions of PGC-1 $\alpha$  to  
345 endurance training responses in the heart through studying genetic loss-of-function.

346  
347 Our work includes several key new findings. First we show that cardiomyocyte PGC-1 $\alpha$   
348 is in fact required in mice for the cardiac adaptation to endurance exercise training. This  
349 is an important distinction from skeletal muscle, where some adaptation to exercise  
350 training occurs despite PGC-1 $\alpha$  deficiency through increased mitochondrial function<sup>13</sup>.  
351 Unexpectedly we found that not only was cardiomyocyte PGC-1 $\alpha$  required for a beneficial  
352 response to exercise, but its absence conferred the rapid onset of impaired resting  
353 contractility, immune fibrotic heart failure, and early systemic wasting (muscle and fat  
354 mass) after training. This establishes a distinct model of physiological stimulus-induced  
355 cardiomyopathy in the absence of heart PGC-1 $\alpha$  separate from the placental-secreted  
356 anti-angiogenic vs pro-angiogenic factors that promote peripartum cardiomyopathy<sup>16</sup>.  
357 Here we show in male mice that an entirely separate mechanism of energetic stress via  
358 voluntary low-load exercise can promote similar dysfunction and upregulation of cardiac  
359 aging-related gene expression.

360  
361 PGC-1 $\alpha$  deficiency in the sedentary state itself promotes the SASP and an aging  
362 myocardial gene expression signature, suggesting that additional repeated energetic  
363 stresses (multiple pregnancies, endurance training) may provide a 'second hit' that  
364 confers cardiomyocyte atrophy in the absence of being able to enhance oxidative  
365 metabolism. Interestingly, we observe decreased cardiomyocyte proliferation markers  
366 and reduced cell size despite the known role of exercise in promoting these very features  
367 in the mouse heart and a marked transcriptional upregulation of the cell cycle. This



368 suggests that states of increased cardiomyocyte senescence, such as aging,  
369 anthracycline chemotherapy treatment, and metabolic heart failure phenotypes such as  
370 diabetic and heart failure with preserved ejection fraction (HFpEF) may act through  
371 relative PGC-1 $\alpha$  deficiency and that further energetic stress may be maladaptive.

372  
373 Another key finding here is our evidence of the reciprocal relationship of PGC-1 $\alpha$  to  
374 GDF15 expression in the heart. We found this initially in our animal model and show a  
375 directional relationship in mice, cardiomyocytes, and human transcriptomes. GDF15 has  
376 been an important developing therapeutic target for chemotherapy induced nausea and  
377 cancer cachexia particularly since the discovery of its hypothalamic receptor  
378 GFRAL<sup>33,34,39</sup>. It has also been shown that GDF15 expression increases in the heart as  
379 an anti-hypertrophic response during ischemic or pressure-overload related stress.  
380 Recently heart GDF15 was found to be maladaptively upregulated during doxorubicin  
381 treatment when combined with alternate-day fasting, a form of nutrient stress<sup>40</sup>. This work  
382 suggested that exogenous GDF15 was sufficient to confer cardiomyocyte atrophy in that  
383 model. Critically, we demonstrate by isolating the heart EF for comparison of GDF15  
384 protein levels to plasma that heart-derived GDF15 causes a more profound elevation in  
385 local rather than systemic circulating GDF15. This is important in considering tissue-  
386 specific effects of modulating this circulating protein in the context of heart failure. We find  
387 that forced GDF15 reduction in the heart may be anti-atrophic and promotes exercise  
388 tolerance during energy stress. Our AAV silencing experiment provides proof-of-principle  
389 for heart-specific inhibition of local GDF15 to promote exercise and contractile function in  
390 states of relative PGC-1 $\alpha$  deficiency and in cardiac cachexia.

391  
392 Our work has important limitations which provide areas for further study. We  
393 predominantly assessed male mice here. A prior study of the cardiomyocyte PGC-1 $\alpha$ -  
394 deficient mouse suggested an age-associated acceleration of excitation-contraction  
395 uncoupling in female mice as a cause of cardiac dysfunction in the sedentary state<sup>41,42</sup>.  
396 Our transcriptomic studies utilized bulk tissue sequencing to allow for harvesting prior to  
397 additional energetic stress that may be imparted by cardiomyocyte and immunocyte  
398 isolations. Future studies will compare transcriptomes using scRNA seq from these and  
399 related models to identify cell types of origin of the drivers of metabolic and immune-  
400 fibrotic dysfunction in addition to the SASP.

401

402

## 403 **Acknowledgements and Funding**

404

405 This work was supported by National Institute of Health (NIH) grants R01 DK119117 to  
406 B.M.S., NIH grants R01 AG061034 and R35 HL155318 and American Heart Association  
407 (AHA) grant 23MERIT1038415 to A.R., a John S. LaDue Memorial Fellowship from  
408 Harvard Medical School to S.A.K., AHA grant 20CDA35310184 and NIH grant  
409 R21AG077040 to H.L., NIH grant K08HL140200 to J.R., a fellowship from Hope Funds  
410 for Cancer Research (HFCR-20-03-01-02) to H.-G.S., a Deutsche  
411 Forschungsgemeinschaft (DFG, German Research Foundation) grant (Projektnummer  
412 461079553) to M.J.M., a NIH grant 1T32GM145407-01 to T.V., Damon Runyon Cancer  
413 Research Foundation Fellowship (DRG 120-17) and NIH grant K99 DK125722 to P.A.D.,

414 NIH grants HL163172 and K08 HL145019 to A.A., NIH grants K76AG064328 and  
415 R01HL170058 and the Yeatts Fund for Innovative Research to J.D.R.. The authors  
416 acknowledge Yoshiko Iwamoto (Center for Systems Biology, Massachusetts General  
417 Hospital) for help with sample staining, Jollanda Lako, Anuradha Kohli, and Jen Danielson  
418 for administrative support. The authors thank all members of the Spiegelman,  
419 Rosenzweig, Puigserver, and Chouchani labs for helpful discussions.

420

## 421 **Disclosures**

422

423 B.M.S. holds patents related to irisin (WO2015051007A1) and is an academic co-founder  
424 and consultant for Aevum Therapeutics, all unrelated to this current work. J.R. is a  
425 consultant for Takeda Neurosciences, unrelated to this current work. J.D.R. holds patents  
426 related to activin type II receptor signaling (WO2016069234A1, USPTO 11834508), and  
427 has received research support from Amgen, Genentech, and Keros, all unrelated to this  
428 current work. The other authors report no disclosures.

429

## 430 **Author Contributions**

431

432 S.A.K.: Conceptualization, investigation, formal analysis, writing, funding. H.L.:  
433 Conceptualization, investigation. T.V.: Investigation, formal analysis. J.R.:  
434 Conceptualization. L.G.: Formal analysis. C.C.: Investigation. M.J.M.: Conceptualization,  
435 investigation. N.E.H.: Conceptualization. A.V.-C.: Investigation. A.L.S.: Investigation. J.L.:  
436 Investigation. C.C.: Investigation. H-G. S.: Conceptualization. K.A.B.: Investigation. A.K.:  
437 Investigation, formal analysis. R.F.: Investigation. D.B.: Investigation. P.T.E.: Resources.  
438 A.A.: Conceptualization, supervision. P.A.D.: Conceptualization, resources. P.P.:  
439 Conceptualization. J.D.R.: Conceptualization, supervision, resources. B.M.S.:  
440 Supervision, conceptualization, writing, resources, funding. A.R.: Supervision,  
441 conceptualization, writing, resources, funding.

442

443

## 444 **Materials and Methods**

445

### 446 *Ethical approval*

447 All mice were maintained and studied using protocols in accordance with the NIH Guide  
448 for the Care and Use of Laboratory Animals and approved by MGH Animal Care and Use  
449 Committees (protocol number 2015N000029) or by the Institutional Animal Care and Use  
450 Committee (IACUC) of Beth Israel Deaconess Medical Center (protocol number 072-  
451 2020).

452

### 453 *Animal studies*

454

455 Mice with floxed alleles of *Ppargc1a* flanking exons 3 and 4 (JAX #009666), and mice  
456 containing the  $\alpha$ -MHC-Cre transgene (B6.FVB-Tg(Myh6-cre)2182Mds/J, JAX #011038)  
457 were bred to generate mice in the indicated experimental groups. Genotyping for the  
458 *Ppargc1a* floxed allele and  $\alpha$ -MHC-Cre allele was performed with Transnetyx (Cordova,  
459 TN). Wild type 12-week old male mice for the exercise timecourse experiment were

460 obtained from The Jackson Laboratory (C57BL/6J, #000664). Hemizygous transgenic  
461 MCK-PGC-1 $\alpha$  mice<sup>14</sup> were bred in our animal facility on a C57BL/6J background. Wild-  
462 type littermates served as controls. Mice were fed a rodent chow diet with 12 hour light  
463 and dark cycles. Animal maintenance, exercise testing, endurance training and  
464 echocardiography were performed at the Massachusetts General Hospital  
465 Cardiovascular Research Center for Figure 1, and at the Beth Israel Deaconess Medical  
466 Center - Center for Life Sciences Small Animal Facility for Figure 3G-K.

467  
468 Cardiac murine echocardiography was performed on unanesthetized mice. For  
469 experiments corresponding to Figure 1, a Vivid E90 cardiac ultrasound system (GE  
470 Healthcare) using an L8-l8i-D transducer. For experiments corresponding to Figure 3G-  
471 K, a Vevo 2100 microultrasound imaging system (VisualSonics, Toronto, Canada) was  
472 used. The heart was first visualized in long and short axis views followed by M-mode  
473 visualization of the short axis. Images were analyzed using EchoPACS software (Version  
474 201, GE Healthcare). Parasternal short-axis M-mode images at the level of the papillary  
475 muscle were acquired at 10 mm depth to measure mid left ventricular dimensions at end-  
476 diastole (LV internal diameter at end diastole - LVIDd) and end-systole (LVESd).  
477 Interventricular septum (IVS) and LV posterior wall thickness (LVPW) dimensions were  
478 measured at end-diastole. Heart rate (HR) and fractional shortening (FS) was averaged  
479 from three consecutive beats. 3 measurements were obtained and averaged for each  
480 reported data point. Peak stress echo images were obtained immediately following acute  
481 exhaustive treadmill exercise protocol completion. Contractile reserve was measured as  
482 the difference between FS at peak stress and FS at rest.

483  
484 For endurance exercise training, 12-week old male mice were individually housed in pre-  
485 autoclaved plexiglass cages containing a stainless steel running wheel (Mini-mitter, Starr  
486 Life Science, USA; diameter 11.4 cm) containing a tachometer. Mice were allowed to run  
487 voluntarily in continuity for the duration of training (6 weeks for acute exhaustive exercise  
488 testing and peak-stress and rest echocardiography, 8 weeks till euthanization and  
489 collection of tissues for molecular analyses). Mouse wheel running activity was recorded  
490 for at least 3 weeks of the running period (weeks 2-5 since initiation).

491  
492 For acute treadmill exhaustive exercise testing, for 3 days prior to planned formal  
493 exhaustive protocol exercise testing, mice were acclimated to the treadmill. For  
494 experiments corresponding to Figure 1 at MGH an automated treadmill was used  
495 (Columbus Instruments). For experiments corresponding to Figure 3G-K at BIDMC  
496 (Columbus Instruments) a non-automated treadmill was used. For acclimatization, for 3  
497 consecutive days mice were subjected to walking at a pace of 5 meters/min for 15 min  
498 (day 1), 5-10 meters/min for 15 min (day 2), and 5-30 meters/min for 15 min (day 3) with  
499 the treadmill incline set to 10°. For the acute exhaustive running protocol in experiments  
500 corresponding to Figure 1, a warmup period lasted for 5 min and then the treadmill was  
501 accelerated to require a mouse's power output to increase by 3mWatt/min (from a starting  
502 power of 10mWatts) until it reached exhaustion; this typically corresponded to a treadmill  
503 acceleration of 1.5-2m/min<sup>2</sup>. For experiments corresponding to Figure 3G-K, a warmup  
504 period of 10 min at 12 meters/min was followed by stepwise increase in speed by 2  
505 meters/min every 5 minutes. Mice ran until exhaustion was reached which was

506 determined to be that the mice could not keep pace with the treadmill for 3 seconds  
507 without falling back onto the resting pattern and that this behavior repeated 3 consecutive  
508 times. At that point the mouse was removed from the treadmill. For Figure 1, power and  
509 work were calculated based on the distance run, the angle of the treadmill, the weight of  
510 the mouse, and the velocity achieved.

511  
512 For tissue analyses, mice were euthanized with 4% isoflurane inhalation followed by  
513 cardiac puncture and exsanguination. Tissues were snap frozen in liquid nitrogen. Apical  
514 sections of the heart (approximately 15-20 mg) were cut using a sterile razor using a glass  
515 cutting block and quickly frozen in OCT preservative (Sakura) in plastic preservative  
516 blocks using 2-methylbutane and dry ice.

517  
518 For heart extracellular fluid (EF) collection, mice were administered continuous 4%  
519 isoflurane by inhalation, the thorax was opened, an incision was made in the right atrium,  
520 a 30 gauge needle was injected in the left ventricular apex and connected to a digital  
521 peristaltic pump (Reglo, Harvard Bioscience Inc.). 10 cc of cold PBS was infused at a rate  
522 of 10 cc/min into each heart, followed by rapid excision. Hearts were dried for 5 seconds  
523 on a Kimwipe (Millipore Sigma). Then following the protocol of Mittenbühler et al., the  
524 heart was placed in a 20 µm nylon mesh filter (Millipore Sigma), folded in half twice, and  
525 placed in a 2 ml Eppendorf tube and spun in a microcentrifuge for 10 minutes at 4 °C.  
526 The fluid spun through the folded mesh filter was defined as heart EF and frozen at -80  
527 °C. For GDF15 ELISA, the R&D DuoSet ELISA for mouse GDF15 was used according to  
528 the manufacturer's instructions. For plasma, 10 µl per sample was used. For heart EF, 5  
529 µl per sample was used. Each sample was run in duplicate.

530  
531 *Adeno-associated virus*

532  
533 Recombinant adeno-associated virus serotype 9 (AAV9) vectors were cloned and  
534 propagated by VectorBuilder (VectorBuilder Inc, Chicago, USA). Both AAV9-shRNA-  
535 Gdf15 and AAV9-shRNA-Scramble vector plasmids harbored shRNA expression driven  
536 by the U6 promoter and CMV promoter driven eGFP expression downstream of the  
537 shRNA insert. Vector plasmids utilized are the following: AAV9-shRNA-Gdf15 -  
538 VB900139-2079dda, AAV9-shRNA-Scramble - VB010000-0023jze. Recombinant AAV  
539 was produced in HEK293T cells. AAVs were administered at a dose of  $5 \times 10^{11}$  viral  
540 genomes (v.g.)/mouse by diluting in a final volume of 200 µl PBS via tail-vein injection  
541 using 1 ml 30 Ga insulin syringes (B.H. Supplies). Mice were maintained in the sedentary  
542 state for 1 week following AAV administration and then treadmill testing,  
543 echocardiography and exercise training was initiated.

544  
545 *Quantitative real-time PCR for mRNA expression*

546  
547 Total RNA from each tissue or frozen cells was extracted using TRIzol (Invitrogen),  
548 purified with RNeasy Mini spin columns (Qiagen), and reverse transcribed using a  
549 HighCapacity cDNA Reverse Transcription kit (Applied Biosystems). The resulting cDNA  
550 was analyzed by RT-qPCR using SYBR green fluorescent dye 2x qPCR master mix  
551 (Promega) in a QuantStudio 6 Flex Real-Time PCR System (Applied Biosystems). The

552 Rplp0 mRNA was used as a loading control, and fold change was calculated using the  
553  $\Delta\Delta C_t$  method. Primer sequences were generated using the IDT PrimerQuest tool  
554 (Integrated DNA Technologies).

#### 555 556 *RNA sequencing*

557  
558 RNA sequencing was performed by Novogene. Libraries were constructed from polyA-  
559 selected RNA using a NEBNext Ultra Directional RNA Library Prep Kit (New England  
560 Biolabs) and sequenced on Illumina HiSeq2500 instrument. The R package DESeq2 was  
561 used for differential gene expression analysis. Genes were considered differentially  
562 expressed if upregulated by  $\log_2FC > 1$  or downregulated by  $\log_2FC < -1$  with an adjusted  
563 P-value  $< 0.05$  (using Benjamini-Hochberg correction). Gene Ontology (GO)  
564 overrepresentation analysis was performed using the database using the WebGestalt  
565 program<sup>24</sup>. For all differentially expressed genes, a metric was computed as the product  
566 of  $\log_2FC$  and  $-\log_{10}(p\text{-value})$ . Gene set enrichment analysis (GSEA<sup>21,22</sup>) using the  
567 'Classic' mode was used to calculate enrichment scores and statistics using DESeq2  
568 normalized expression levels after  $\log_2FC$  ranked expression by gene. Genes for which  
569 average DESeq2 expression values were 0-5 were excluded for GO and GSEA analysis  
570 pre-ranked gene lists. For GSEA analyses, Hallmark gene sets (MsigDB, MH) and cell  
571 type signature gene sets (MsigDB, M8) were used. For senescence geneset analysis,  
572 MsigDB GO genesets were queried. For the SASP gene set analysis, a consensus  
573 senescence associated secretory phenotype SASP gene set (SenMayo) was used.

#### 574 575 *Immunoblotting*

576  
577 For immunoblotting of murine tissues, approximately 40-50 mg of each tissue was used.  
578 Tissues were prepared in ice-cold RIPA buffer (150 mM NaCl, 1% Nonidet P-40, 0.5%  
579 sodium deoxycholate, 0.1% SDS, 50 mM Tris pH 7.4) supplemented with Complete  
580 EDTA-free protease inhibitor [Roche]. Tissues were homogenized using a Polytron PT  
581 10-35GT homogenizer (Kinematica). Protein concentration of the lysates was determined  
582 by bicinchoninic acid assay (Pierce), followed by denaturation in Laemmli buffer (50 mM  
583 Tris pH 6.8, 2% SDS, 10% glycerol, 100 mM DTT, and 0.05% bromophenol blue).  
584 Proteins were resolved by SDS-PAGE in 4-12% NuPAGE Bis-Tris gels (Invitrogen) and  
585 transferred to polyvinylidene difluoride membrane with 0.45  $\mu\text{m}$  pore size (ImmobilonP).  
586 Membranes were blocked with Tris-buffered saline with 0.05% Tween-20 (TBST)  
587 containing 5% dried nonfat milk (Biorad). Primary antibodies were diluted in TBS-T  
588 containing 5% dry nonfat milk (Biorad). Membranes were incubated overnight at 4 °C with  
589 primary antibody. For secondary antibody incubation, anti-rabbit HRP (Promega) or anti-  
590 mouse HRP (Promega) was diluted in TBST containing 5% dried nonfat milk. Secondary  
591 antibodies were visualized using enhanced chemiluminescence western blotting  
592 substrates (Pierce), Immobilon Crescendo HRP substrate (Millipore). Primary antibodies  
593 in this study include the following: Col3a1 (Novus Biologicals, NB600-594), periostin  
594 (Abcam, ab92460), Vimentin (Cell Signaling Technology, 5741S), smooth muscle actin  
595 (SMA) (Thermo Fisher, NBP233006A) TGF $\beta$ 1 (Cell Signaling Technology, 3711S),  
596 GAPDH (Cell Signaling Technology, 97166S). Secondary antibody used in this study was  
597 the following: Anti-Rabbit IgG (H+L), HRP Conjugate, (Promega, W4011).

598

599 *Neonatal rat ventricular myocyte isolation and experiments*

600

601 Primary neonatal rat ventricular cardiomyocytes (NRVMs) were isolated as described  
602 previously<sup>25,43</sup>. Isolated NRVMs were purified by pre-plating and percoll gradient  
603 centrifugation. NRVMs were plated in 6-well plates precoated with gelatin (Sigma) at  
604  $0.8 \times 10^5$  cells per well and cultured in NRVM medium (DMEM supplemented with 5% FBS  
605 and 10% horse serum) for 24 hours. Before treatment, NRVMs were synchronized and  
606 cultured in DMEM containing 0.2% FBS. Twenty-four hours after plating, cells were  
607 treated with adenovirus expressing PGC-1 $\alpha$  as described previously<sup>35</sup> (at multiplicity of  
608 infection of 100), or transfected with control siRNA (Thermo, 4390843) or siRNA to rat  
609 Ppargc1a (s135986). Transfections were performed using RNAiMax transfection reagent  
610 (Thermo) according to the manufacturer's protocol in Optimem medium containing 5%  
611 FBS with a final siRNA concentration of 25 nM. 18 hours later media containing siRNA or  
612 adenovirus was removed and replaced with NRVM medium. Then 6 hours later NRVMs  
613 were treated with PBS or 100ng/mL IGF1 (291-G1-01M; R&D Systems) to elicit  
614 physiological hypertrophy for 48 hours prior to cell harvesting for experiments. For GDF15  
615 treatment of NRVMs, NRVMs were plated as above in 6-well plates coated with gelatin  
616 at a density of 600,000 cells/well in NRVM medium. 48 hours later, cells were incubated  
617 in serum free DMEM containing 1 mM sodium pyruvate (Gibco) containing PBS, IGF1 (1  
618 ng/ml), recombinant human GDF15 (500 ng/ml; 957GD025CF), or both IGF1 and GDF15  
619 in a total volume of 2 ml/well at the indicated concentrations for 48 hrs.

620

621 For quantitative RT-PCR, RNA from each well was harvested in 1 ml of TRIzol. ATP  
622 concentration was quantified using the ATP determination assay from Thermo (A22066).  
623 Cells were counted on a light microscope (at least 10 high power fields per well were  
624 counted) and used for normalization, and cells were lysed in 1x Cell Lysis Buffer (Cell  
625 Signaling Technology, 9803) supplemented with Complete EDTA-free protease inhibitor  
626 [Roche] before performing the ATP determination assay.

627

628 For measurement of NRVM cell size, cells were washed and fixed in 4%  
629 paraformaldehyde for 15 min, then washed with PBS. Regions of interest for staining  
630 were outlined with ImmEdge pen and then blocked for 30 min at room temperature using  
631 4% normal goat serum, 1% BSA, 0.2% triton-X 100 in PBS. After rinsing the plates, cells  
632 were stained with anti-sarcomeric alpha actinin antibody (Abcam, ab9465) 1:200 in  
633 antibody buffer (1% BSA, 0.1% triton-X 100 in PBS) for 2 hours at room temperature.  
634 Plates were washed and stained with goat-anti-mouse Alexa 594 antibody (Invitrogen  
635 A11032) 1:500 in antibody buffer for 2 hours at room temperature and then washed and  
636 stained with DAPI and then imaged with Leica DM500B Microscope. Cardiomyocyte  
637 cross-sectional area (~100 cells per well) was measured from randomly selected sections  
638 per heart using ImageJ (NIH).

639

640 *Immunohistochemistry of mouse heart sections*

641

642 Apical sections were stained with Wheat Germ Agglutinin (WGA), Alexa Fluor<sup>TM</sup> 594  
643 (W11262, Thermo Fisher Scientific) for cell size measurement. WGA stained slides were

644 scanned by a digital slide scanner, NanoZoomer 2.0-RS (Hamamatsu, Japan). For  
645 cardiomyocyte analysis, immunofluorescent staining was performed. Anti-PCM1 antibody  
646 (HPA023374, SigmaAldrich, cardiomyocyte specific marker) was incubated at 4°C  
647 overnight and a biotinylated secondary antibody followed by streptavidin-DyLight 594  
648 (BA1000 and SA-5594, Vector Laboratories) were used for cardiomyocyte identification.  
649 Nuclei were counterstained with DAPI (D21490, Thermo Fisher Scientific) and the slides  
650 were imaged on a Leica DM500B Microscope. Cardiomyocyte cross-sectional area (~100  
651 cells per heart) was measured from six randomly selected sections per heart using  
652 ImageJ from WGA stained cells (NIH). For cardiomyocyte proliferation marker  
653 quantification, anti-Ki67 antibody (clone: SolA15, 14-5698- 82, Thermo Fisher Scientific)  
654 and Alexa Fluor 488 goat anti-rat IgG secondary antibody (A-11006, Thermo Fisher  
655 Scientific) were applied. For CD68 staining, BioLegend (valid) # 137001 ) sections were  
656 incubated with a rat anti-mouse CD68 antibody (BioLegend (valid) #137001) for 2 hr at  
657 room temperature. Alexa Fluor 568 goat anti-rat IgG antibody was used as a secondary  
658 antibody. For CD3 staining, anti-mouse CD3 primary antibody was used for incubation  
659 for 2 hrs at room temperature (BD Biosciences (valid) # 555273 ), followed by Alexa fluor  
660 568 goat-anti-rat IgG secondary antibody. For Picrosirius Red Staining we followed the  
661 manufacturer's instructions (Polysciences, #24901). Briefly, frozen OCT heart sections  
662 were stained, dehydrated, cleared, and mounted, followed by imaging using light  
663 microscopy. Quantification of positive staining per HPF was quantified in Image J (NIH).

664

#### 665 *Single Nuclear RNA sequencing (snRNA-seq) analysis*

666

667 Data for snRNA-seq was downloaded from The Broad Institute Single Cell Portal<sup>37</sup>. The  
668 three cardiomyocyte clusters were subset from the entire dataset, normalized using  
669 SCTransform and analyzed using a Seurat pipeline in R 4.2.1. Correlations of  
670 cardiomyocyte gene expression with immune cell proportions and clinic measures of  
671 heart function from Chaffin, et al, *Nature*, 2022<sup>37</sup> were performed in Prism GraphPad  
672 10.1.0.

673

#### 674 *Bulk RNA sequencing immune deconvolution*

675

676 FPKM counts from the bulk heart RNA sequencing previously described was loaded into  
677 R 4.2.1. The immunedeconv R package (<https://doi.org/10.1093/bioinformatics/btz363>)  
678 was then used to deconvolute the immune signatures in the RNA sequencing using  
679 mMCPCounter (<https://doi.org/10.1186/s13073-020-00783-w>) and DCQ  
680 (<https://doi.org/10.1002/msb.134947>) on the native mouse data. Relative proportions  
681 were graphed, and statistical tests were run in Prism GraphPad 10.1.0.

682

#### 683 *Statistics, analysis and reproducibility*

684

685 Replicate numbers are indicated in figure legends. Sample sizes were determined based  
686 on prior experiments using similar methods. Unless otherwise stated, data are presented  
687 as mean +/- standard error of the mean. Graphing and statistical analyses, including two-  
688 tailed Student's t-test, one-way ANOVA, and Fisher's LSD, were performed using

689 GraphPad Prism 10 (GraphPad). Images in the figures were created using Biorender  
690 (Biorender.com).

691

## 692 **Figure Legends**

693

694 **Figure 1: Failure to adapt to endurance exercise training in cardiomyocyte PGC-1 $\alpha$**   
695 **deficient mice. A.** Conscious murine echocardiography measures of left ventricular  
696 internal diameter in diastole (LVIDd), interventricular septum dimension in diastole (IVSd),  
697 left ventricular posterior wall thickness in diastole (LVPWd), fractional shortening (FS),  
698 and heart rate (HR) in sedentary WT or KO mice. **B.** Acute treadmill exercise test results  
699 for work output achieved, maximum velocity, and max distance run at exhaustion in mice  
700 from A. **C.** M-mode murine echocardiographic images of mice in B at rest and immediately  
701 after cessation of treadmill running. **D.** (left) FS and LVIDd at rest and with peak stress in  
702 mice from B. (right) **E.** Cumulative voluntary running distance by WT and KO mice over 5  
703 weeks of endurance exercise training. **F.** Acute treadmill exercise testing in mice from E  
704 before and after 6 weeks of voluntary wheel running. **G.** Resting M-mode murine  
705 echocardiographic images of mice in E-F before training and at 6 weeks of endurance  
706 training. **H.** FS and LVIDd from rest echocardiographic images from G both before and  
707 after 6 weeks of wheel running. Data is expressed as mean  $\pm$  S.E.M.. For A and B,  
708 \*\*\*P<0.001, \*\*\*\*P<0.0001, Unpaired T-test; for D-H, \*P<0.05, \*\*P<0.01, \*\*\*P<0.001,  
709 Unpaired T-test with Welch's correction.

710

711 **Figure 2: Immune-fibrotic heart failure in exercise-trained cardiomyocyte PGC-1 $\alpha$**   
712 **KO mice. A.** Body weight, heart weight relative to tibia length (HW/TL) and lung weight  
713 normalized to body weight in sedentary (Sed) or 8 week exercise trained (Ex) WT or KO  
714 mice. **B.** Bulk heart gene expression by quantitative RT-PCR from the mice in A. A.  
715 Expression of indicated genes was normalized to that of Rplp0. **C.** Mitochondrial DNA  
716 (mtDNA) in total heart DNA extracts from mice in A. Total mtDNA was measured by  
717 quantitative RT-PCR using mtDNA primers mtDloop and mtCytb and normalized for each  
718 sample to nuclear DNA copy number using primers for  $\beta$ -actin. **D.** Gene set enrichment  
719 plot for Hallmark OXPHOS genes in the comparison of WT\_Ex vs WT\_Sed mice (left)  
720 and KO\_Ex vs KO\_Sed mice (right) using bulk heart RNA seq normalized gene  
721 expression. **E.** Heatmap of relative gene expression from RNA seq data expressed as  
722  $\log_2$ (fold change) relative to the WT\_Sed group for representative hallmark OXPHOS  
723 genes and selected known PGC-1 $\alpha$  targets. **F.** Top 10 Gene Ontology Biological Process  
724 terms for downregulated (top) and upregulated (bottom) genes (P<sub>adj</sub> < 0.05) from RNA  
725 seq data in D for comparison of KO\_Sed vs WT\_Sed groups (left) and KO\_Ex vs WT\_Ex  
726 groups (right). Enrichment scores are plotted as dots with color corresponding to  
727 enrichment score FDR value according to the colorscale. **G.** Heatmap of relative gene  
728 expression from RNA seq data for representative Hallmark inflammatory response genes  
729 (top) and Hallmark extracellular matrix (ECM) genes (bottom). **H.** Representative images  
730 from CD68 (pink), PCM1 (red), and DAPI (blue) staining of frozen heart sections from  
731 indicated mice (left) and quantification of CD68+/DAPI+ stains per high power field (HFP)  
732 from mice of each group (right). **I.** Representative images from Picrosirius red collagen  
733 staining from indicated mice (left) and quantification of positive staining per HPF (right).  
734 **J.** Relative mRNA expression of indicated genes in NRVMs treated with recombinant



735 adenovirus expressing GFP (Ad-GFP), PGC-1 $\alpha$  (Ad-PGC-1 $\alpha$ ), siRNA to a scramble  
736 control sequence (siCtrl) or to rat PGC-1 $\alpha$  (siPGC-1 $\alpha$ ), and with or without IGF1 treatment  
737 for 48 hrs prior to cell lysis for RNA extraction. Expression was normalized to that of  
738 Rps18. **K.** ATP concentration in NRVM cell lysates. Data is expressed as mean +/-  
739 S.E.M.. \*P<0.05, \*\*P<0.01, \*\*\*P<0.001, \*\*\*\* P<0.0001, student's unpaired T-test with  
740 Welch's correction.

741  
742 **Figure 3: Cardiac atrophy, upregulated SASP and GDF15 in cardiomyocyte PGC-**  
743 **1 $\alpha$  deficiency.** **A.** Representative images of staining of frozen heart sections from  
744 indicated mice for PCM1 and DAPI (left) and quantification of PCM1+/DAPI+ staining per  
745 HPF (right). **B.** Representative images (left) and quantification (right) of Ki67 proliferation  
746 marker staining in WT\_Ex and KO\_Ex hearts. White arrowhead indicates  
747 Ki67+/PCM+/DAPI+ nuclei (cardiomyocytes). Yellow arrowhead indicates Ki67+/PCM-  
748 /DAPI+ nuclei (noncardiomyocytes). **C.** Wheat germ agglutinin (WGA) and DAPI staining  
749 of the hearts from **B.** **D.** (Top) Normalized enrichment scores for gene set enrichment for  
750 the SASP geneset (SenMayo) in indicated groups. For all comparisons FDR p-value <  
751 0.05. (Bottom) Heat map of relative expression of SASP genes in RNA seq data  
752 expressed as log<sub>2</sub>(fold change) relative to the mean of the WT\_Sed group. **E.** Volcano  
753 plot of differentially expressed protein-coding genes (FDR p-value < 0.05) in  
754 transcriptome from bulk heart RNA seq data for KO\_Sed vs WT\_Sed (blue) and KO\_Ex  
755 vs WT\_Ex (pink). **F.** (Top) Schematic diagram of extracellular space and approach to  
756 collection of heart extracellular fluid (EF). (Bottom left) Plasma GDF15 concentration from  
757 indicated groups of sedentary or exercised WT and KO mice measured by mouse GDF15  
758 ELISA. (Bottom right) Heart EF GDF15 concentration using the same ELISA. **G.** (Left)  
759 Representative images for sarcomeric  $\alpha$ -actinin staining of cardiomyocyte size in NRVMs  
760 treated for 48 hrs in serum-free media with PBS, IGF1 (1 ng/ml), GDF15 (500 ng/ml), or  
761 both IGF1 and GDF15. Cells were counter-stained with DAPI. (Right) Quantification of  
762 relative surface area of NRVMs in each group. **H.** Experimental design of AAV9-shRNA  
763 Scramble vs AAV9-shRNA Gdf15 expression and exercise tolerance experiment in WT  
764 and KO mice. **I.** Relative heart expression of indicated genes in mice from experiment in  
765 **H.** **J.** (Left) M-mode murine echocardiographic images of mice from **G** at rest prior to and  
766 at 5 weeks of exercise training. (Right) Quantification of FS from echo images in **I.** **K.** Max  
767 running distance in treadmill exercise test from mice in **G** prior to and at 5 weeks of  
768 exercise training. Data is expressed as mean +/- S.E.M. For A-C, H, J, and K, \*P<0.05,  
769 \*\*\*P<0.001, \*\*\*\* P<0.0001, student's unpaired T-test for the indicated groups. For F,  
770 \*\*\*\*P<0.0001, one-way ANOVA with Holm-Šídák's multiple comparisons test to the Ctrl  
771 group.

772  
773 **Figure 4: Cell-type resolved PPARGC1A expression in human cardiomyopathies.**  
774 **A.** (Left) t-SNE plot showing 592,689 single cells from hearts from nonfailing human  
775 hearts (N=16), hearts from individuals with HCM (N=15) and hearts from individuals with  
776 DCM (N=11). (Right). Relative expression heatmap of PPARGC1A on the t-SNE plot. **B.**  
777 Relative expression of PPARGC1A in cardiomyocytes from **A** in NF, DCM and HCM  
778 hearts. Mean normalized expression is written below each group. **C.** Correlation between  
779 log(10) normalized PPARGC1A expression in cardiomyocytes (CM), to indicated  
780 measures with linear regression coefficient R<sup>2</sup> and p-value indicated. **D.** Summary of

781 physiological consequences of cardiomyocyte PGC-1 $\alpha$  deficiency or relative reduction in  
782 the context of exercise and myocardial mitochondrial stress. For B, data is expressed as  
783 mean +/- S.E.M. \*\*\*\*P<0.0001, Wilcoxon Rank-sum test comparison to NF group.  
784

785 **Figure S1: Acute treadmill exercise heart gene expression timecourse. A.**  
786 Experimental design of timecourse. **B-G.** Relative mRNA levels of the indicated genes at  
787 the indicated timepoints following acute treadmill exercise for 45 min. N=6 mice per group.  
788 Data is presented as mean +/- S.E.M.

789  
790 **Figure S2: Fat and muscle mass and gene expression in inguinal white adipose**  
791 **tissue in sedentary vs exercise trained WT and KO mice. A.** Relative inguinal white  
792 adipose tissue (iWAT) and gastrocnemius weights normalized to body weight in indicated  
793 mice. **B.** Relative expression of the indicated genes in iWAT normalized to that of Rplp0.  
794 **C.** Relative expression of indicated genes in gastrocnemius normalized to that of Rplp0.  
795 Data is expressed as mean +/- S.E.M.. \*P<0.05, student's unpaired T-test. Data is  
796 presented as mean +/- S.E.M.

797  
798 **Figure S3: Relative immunocyte content in hearts of sedentary and exercise trained**  
799 **WT and KO mice. A.** Immune cell relative frequency from deconvolution analysis of heart  
800 bulk RNA seq data corresponding to Figure 2 using the murine Microenvironment Cell  
801 Population counter (mMcp counter) tool. **B.** Immune cell deconvolution analysis of RNA  
802 seq data from A using the Digital Cell Quantification (DCQ) tool. **C.** Representative  
803 images of CD3 staining of frozen heart sections from mice in A (left) and quantification of  
804 CD3+/DAPI+ stains per HPF. **D.** Immunoblot for fibrosis markers from heart lysates of  
805 mice in A. N=3 per group. Data is expressed as mean +/- S.E.M.. \*P<0.05, \*\*P<0.01,  
806 \*\*\*P<0.001, \*\*\*\* P<0.0001, student's unpaired T-test. Data is presented as mean +/-  
807 S.E.M.

808  
809 **Figure S4: PGC-1 $\alpha$  gain- or loss-of-function, cardiomyocyte size, and GDF15 in**  
810 **NRVMs and mice. A.** (Top) Representative images from sarcomeric  $\alpha$ -actinin staining of  
811 NRVMs after adenoviral PGC-1 $\alpha$  overexpression or siRNA PGC-1 $\alpha$  knockdown in the  
812 context of IGF1 stimulation of physiological hypertrophy as described in Figure 2J-K. Cells  
813 were costained with DAPI to identify nuclei. (Bottom) quantification of relative cell size  
814 from staining. **B.** Geneset enrichment scores for indicated group comparisons for Tabula  
815 Muris Sensis aging cell type gene signatures (top) and Descartes Organogenesis cell  
816 type gene signatures (bottom), both sets obtained from MsigDB ([gsea-  
msigdb.org/gsea/msigdb/mouse/genesets.jsp](https://gsea-msigdb.org/gsea/msigdb/mouse/genesets.jsp)) **C.** (Left) Approach to prioritizing genes  
817 encoding secreted proteins in bulk RNA seq analysis from mouse model in Figure 2.  
818 (Right) Enrichment scores for significantly enriched gene ontologies (FDR p-value < 0.05)  
819 for 40 genes corresponding to upregulated secreted proteins from prioritization in B. **D.**  
820 (Top) Geneset enrichment scores for MsigDB GO DNA damage associated senescence  
821 geneset. (Bottom) Heatmap plotting log(2)FC relative to the WT\_Sed group for relative  
822 gene expression for indicated senescence gene markers. Relative expression of  
823 indicated genes in NRVMs according to experimental design in A. **E.** Relative heart  
824 expression of indicated genes in male and female muscle transgenic mice overexpressing  
825

826 PGC-1 $\alpha$ . Data is expressed as mean +/- S.E.M.. \*P<0.05, \*\*P<0.01, \*\*\*P<0.001, \*\*\*\*  
827 P<0.0001, student's unpaired T-test. Data is presented as mean +/- S.E.M.

828

829 **Figure S5: Secretory protein expression phenotype across murine heart failure**  
830 **models. A.** Pie charts showing fraction of upregulated secreted protein, downregulated  
831 secreted protein and remaining protein coding transcripts from differential transcriptome  
832 gene expression analysis of bulk heart RNA seq from KO\_Ex vs WT\_Ex mice  
833 (N=7/group), PGC-1 $\alpha$  WT pregnant female (N=7) vs PGC-1 $\alpha$  cardiomyocyte KO female  
834 mice after 2 pregnancies (N=6), and WT mice that underwent sham (N=4) vs transverse  
835 aortic constriction surgeries (N=4). Cutoff for transcripts included for pairwise  
836 comparisons was FDR<0.05. Secreted protein transcripts were annotated using the  
837 UniProt database. **B.** (Left) Venn diagram of overlapping and distinct differential  
838 transcriptomes that were upregulated in the pairwise comparisons from A across the 3  
839 comparisons. (Right) Arrows point to bar charts of enrichment scores for top 10  
840 overrepresented GO terms for the gene sets indicated by the boxes from the Venn  
841 diagram. **C.** Heatmap plotting log(2)FC relative to the control groups for each of the 3  
842 studies in A for the normalized expression of the genes corresponding to the SASP  
843 geneset.

844

845 **Figure S6: PPARGC1A correlations with GDF15 in human tissues: A-F.** Correlation  
846 of PPARGC1A expression with GDF15 expression in indicated tissues from deposited  
847 bulk RNA seq data (NCBI GEO) using the ARCHS<sup>4</sup> database. Correlation coefficient from  
848 linear regression and p-value are shown.

849

850

851  
852  
853  
854  
855  
856  
  
857  
858  
859  
860  
861  
  
862  
863  
864  
865  
  
866  
867  
868  
869  
  
870  
871  
872  
  
873  
874  
875  
  
876  
877  
878  
  
879  
880  
881  
  
882  
883  
  
884  
885  
886

## References

1. Virani, S.S., Alonso, A., Aparicio, H.J., Benjamin, E.J., Bittencourt, M.S., Callaway, C.W., Carson, A.P., Chamberlain, A.M., Cheng, S., Delling, F.N., et al. (2021). Heart Disease and Stroke Statistics-2021 Update: A Report From the American Heart Association. *Circulation* *143*, e254–e743. [10.1161/CIR.0000000000000950](https://doi.org/10.1161/CIR.0000000000000950).
2. Campbell, K.L., Winters-Stone, K.M., Wiskemann, J., May, A.M., Schwartz, A.L., Courneya, K.S., Zucker, D.S., Matthews, C.E., Ligibel, J.A., Gerber, L.H., et al. (2019). Exercise Guidelines for Cancer Survivors: Consensus Statement from International Multidisciplinary Roundtable. *Med Sci Sports Exerc* *51*, 2375–2390. [10.1249/MSS.0000000000002116](https://doi.org/10.1249/MSS.0000000000002116).
3. Contrepolis, K., Wu, S., Moneghetti, K.J., Hornburg, D., Ahadi, S., Tsai, M.-S., Metwally, A.A., Wei, E., Lee-McMullen, B., Quijada, J.V., et al. (2020). Molecular Choreography of Acute Exercise. *Cell* *181*, 1112-1130.e16. [10.1016/j.cell.2020.04.043](https://doi.org/10.1016/j.cell.2020.04.043).
4. Schmitz, K.H., Campbell, A.M., Stuiver, M.M., Pinto, B.M., Schwartz, A.L., Morris, G.S., Ligibel, J.A., Cheville, A., Galvão, D.A., Alfano, C.M., et al. (2019). Exercise is medicine in oncology: Engaging clinicians to help patients move through cancer. *CA Cancer J Clin* *69*, 468–484. [10.3322/caac.21579](https://doi.org/10.3322/caac.21579).
5. Hawley, J.A., Lundby, C., Cotter, J.D., and Burke, L.M. (2018). Maximizing Cellular Adaptation to Endurance Exercise in Skeletal Muscle. *Cell Metab* *27*, 962–976. [10.1016/j.cmet.2018.04.014](https://doi.org/10.1016/j.cmet.2018.04.014).
6. Chow, L.S., Gerszten, R.E., Taylor, J.M., Pedersen, B.K., van Praag, H., Trappe, S., Febbraio, M.A., Galis, Z.S., Gao, Y., Haus, J.M., et al. (2022). Exerkines in health, resilience and disease. *Nat Rev Endocrinol*. [10.1038/s41574-022-00641-2](https://doi.org/10.1038/s41574-022-00641-2).
7. Leuchtman, A.B., Adak, V., Dilbaz, S., and Handschin, C. (2021). The Role of the Skeletal Muscle Secretome in Mediating Endurance and Resistance Training Adaptations. *Front Physiol* *12*, 709807. [10.3389/fphys.2021.709807](https://doi.org/10.3389/fphys.2021.709807).
8. Egan, B., and Sharples, A.P. (2023). Molecular responses to acute exercise and their relevance for adaptations in skeletal muscle to exercise training. *Physiol Rev* *103*, 2057–2170. [10.1152/physrev.00054.2021](https://doi.org/10.1152/physrev.00054.2021).
9. Murphy, R.M., Watt, M.J., and Febbraio, M.A. (2020). Metabolic communication during exercise. *Nat Metab* *2*, 805–816. [10.1038/s42255-020-0258-x](https://doi.org/10.1038/s42255-020-0258-x).
10. Ashcroft, S.P., Stocks, B., Egan, B., and Zierath, J.R. (2023). Exercise induces tissue-specific adaptations to enhance cardiometabolic health. *Cell Metab*, S1550-4131(23)00459-X. [10.1016/j.cmet.2023.12.008](https://doi.org/10.1016/j.cmet.2023.12.008).

- 887 11. Vega, R.B., Konhilas, J.P., Kelly, D.P., and Leinwand, L.A. (2017). Molecular  
888 Mechanisms Underlying Cardiac Adaptation to Exercise. *Cell Metab* 25, 1012–1026.  
889 10.1016/j.cmet.2017.04.025.
- 890 12. Arany, Z., He, H., Lin, J., Hoyer, K., Handschin, C., Toka, O., Ahmad, F., Matsui, T.,  
891 Chin, S., Wu, P.-H., et al. (2005). Transcriptional coactivator PGC-1 alpha controls  
892 the energy state and contractile function of cardiac muscle. *Cell Metab* 1, 259–271.  
893 10.1016/j.cmet.2005.03.002.
- 894 13. Furrer, R., Heim, B., Schmid, S., Dilbaz, S., Adak, V., Nordström, K.J.V., Ritz, D.,  
895 Steurer, S.A., Walter, J., and Handschin, C. (2023). Molecular control of endurance  
896 training adaptation in male mouse skeletal muscle. *Nat Metab* 5, 2020–2035.  
897 10.1038/s42255-023-00891-y.
- 898 14. Lin, J., Wu, H., Tarr, P.T., Zhang, C.-Y., Wu, Z., Boss, O., Michael, L.F., Puigserver,  
899 P., Isotani, E., Olson, E.N., et al. (2002). Transcriptional co-activator PGC-1 alpha  
900 drives the formation of slow-twitch muscle fibres. *Nature* 418, 797–801.  
901 10.1038/nature00904.
- 902 15. Karamanlidis, G., Garcia-Menendez, L., Kolwicz, S.C., Lee, C.F., and Tian, R.  
903 (2014). Promoting PGC-1 $\alpha$ -driven mitochondrial biogenesis is detrimental in  
904 pressure-overloaded mouse hearts. *Am J Physiol Heart Circ Physiol* 307, H1307-  
905 1316. 10.1152/ajpheart.00280.2014.
- 906 16. Patten, I.S., Rana, S., Shahul, S., Rowe, G.C., Jang, C., Liu, L., Hacker, M.R., Rhee,  
907 J.S., Mitchell, J., Mahmood, F., et al. (2012). Cardiac angiogenic imbalance leads to  
908 peripartum cardiomyopathy. *Nature* 485, 333–338. 10.1038/nature11040.
- 909 17. Arany, Z., Novikov, M., Chin, S., Ma, Y., Rosenzweig, A., and Spiegelman, B.M.  
910 (2006). Transverse aortic constriction leads to accelerated heart failure in mice  
911 lacking PPAR-gamma coactivator 1alpha. *Proc Natl Acad Sci U S A* 103, 10086–  
912 10091. 10.1073/pnas.0603615103.
- 913 18. Gill, J.F., Delezie, J., Santos, G., McGuirk, S., Schnyder, S., Frank, S., Rausch, M.,  
914 St-Pierre, J., and Handschin, C. (2019). Peroxisome proliferator-activated receptor  $\gamma$   
915 coactivator 1 $\alpha$  regulates mitochondrial calcium homeostasis, sarcoplasmic reticulum  
916 stress, and cell death to mitigate skeletal muscle aging. *Aging Cell* 18, e12993.  
917 10.1111/accel.12993.
- 918 19. Boström, P., Mann, N., Wu, J., Quintero, P.A., Plovie, E.R., Panáková, D., Gupta,  
919 R.K., Xiao, C., MacRae, C.A., Rosenzweig, A., et al. (2010). C/EBP $\beta$  controls  
920 exercise-induced cardiac growth and protects against pathological cardiac  
921 remodeling. *Cell* 143, 1072–1083. 10.1016/j.cell.2010.11.036.
- 922 20. Jannig, P.R., Dumesic, P.A., Spiegelman, B.M., and Ruas, J.L. (2022). SnapShot:  
923 Regulation and biology of PGC-1 $\alpha$ . *Cell* 185, 1444-1444.e1.  
924 10.1016/j.cell.2022.03.027.

- 925 21. Subramanian, A., Tamayo, P., Mootha, V.K., Mukherjee, S., Ebert, B.L., Gillette,  
926 M.A., Paulovich, A., Pomeroy, S.L., Golub, T.R., Lander, E.S., et al. (2005). Gene set  
927 enrichment analysis: a knowledge-based approach for interpreting genome-wide  
928 expression profiles. *Proc Natl Acad Sci U S A* 102, 15545–15550.  
929 10.1073/pnas.0506580102.
- 930 22. Mootha, V.K., Lindgren, C.M., Eriksson, K.-F., Subramanian, A., Sihag, S., Lehar, J.,  
931 Puigserver, P., Carlsson, E., Ridderstråle, M., Laurila, E., et al. (2003). PGC-1alpha-  
932 responsive genes involved in oxidative phosphorylation are coordinately  
933 downregulated in human diabetes. *Nat Genet* 34, 267–273. 10.1038/ng1180.
- 934 23. Howe, D.G., Blake, J.A., Bradford, Y.M., Bult, C.J., Calvi, B.R., Engel, S.R., Kadin,  
935 J.A., Kaufman, T.C., Kishore, R., Lauderkind, S.J.F., et al. (2018). Model organism  
936 data evolving in support of translational medicine. *Lab Anim (NY)* 47, 277–289.  
937 10.1038/s41684-018-0150-4.
- 938 24. Liao, Y., Wang, J., Jaehnig, E.J., Shi, Z., and Zhang, B. (2019). WebGestalt 2019:  
939 gene set analysis toolkit with revamped UIs and APIs. *Nucleic Acids Res* 47, W199–  
940 W205. 10.1093/nar/gkz401.
- 941 25. Li, H., Trager, L.E., Liu, X., Hastings, M.H., Xiao, C., Guerra, J., To, S., Li, G., Yeri,  
942 A., Rodosthenous, R., et al. (2022). IncExACT1 and DCHS2 Regulate Physiological  
943 and Pathological Cardiac Growth. *Circulation*.  
944 10.1161/CIRCULATIONAHA.121.056850.
- 945 26. DeBosch, B., Treskov, I., Lupu, T.S., Weinheimer, C., Kovacs, A., Courtois, M., and  
946 Muslin, A.J. (2006). Akt1 is required for physiological cardiac growth. *Circulation* 113,  
947 2097–2104. 10.1161/CIRCULATIONAHA.105.595231.
- 948 27. McMullen, J.R., Shioi, T., Huang, W.-Y., Zhang, L., Tarnavski, O., Bisping, E.,  
949 Schinke, M., Kong, S., Sherwood, M.C., Brown, J., et al. (2004). The insulin-like  
950 growth factor 1 receptor induces physiological heart growth via the phosphoinositide  
951 3-kinase(p110alpha) pathway. *J Biol Chem* 279, 4782–4793.  
952 10.1074/jbc.M310405200.
- 953 28. Saul, D., Kosinsky, R.L., Atkinson, E.J., Doolittle, M.L., Zhang, X., LeBrasseur, N.K.,  
954 Pignolo, R.J., Robbins, P.D., Niedernhofer, L.J., Ikeno, Y., et al. (2022). A new gene  
955 set identifies senescent cells and predicts senescence-associated pathways across  
956 tissues. *Nat Commun* 13, 4827. 10.1038/s41467-022-32552-1.
- 957 29. Basisty, N., Kale, A., Jeon, O.H., Kuehnemann, C., Payne, T., Rao, C., Holtz, A.,  
958 Shah, S., Sharma, V., Ferrucci, L., et al. (2020). A proteomic atlas of senescence-  
959 associated secretomes for aging biomarker development. *PLoS Biol* 18, e3000599.  
960 10.1371/journal.pbio.3000599.
- 961 30. Mehdizadeh, M., Aguilar, M., Thorin, E., Ferbeyre, G., and Nattel, S. (2022). The role  
962 of cellular senescence in cardiac disease: basic biology and clinical relevance. *Nat*  
963 *Rev Cardiol* 19, 250–264. 10.1038/s41569-021-00624-2.

- 964 31. Victorelli, S., Salmonowicz, H., Chapman, J., Martini, H., Vizioli, M.G., Riley, J.S.,  
965 Cloix, C., Hall-Younger, E., Machado Espindola-Netto, J., Jurk, D., et al. (2023).  
966 Apoptotic stress causes mtDNA release during senescence and drives the SASP.  
967 *Nature* 622, 627–636. 10.1038/s41586-023-06621-4.
- 968 32. Suda, M., Paul, K.H., Minamino, T., Miller, J.D., Lerman, A., Ellison-Hughes, G.M.,  
969 Tchkonja, T., and Kirkland, J.L. (2023). Senescent Cells: A Therapeutic Target in  
970 Cardiovascular Diseases. *Cells* 12, 1296. 10.3390/cells12091296.
- 971 33. Wang, D., Day, E.A., Townsend, L.K., Djordjevic, D., Jørgensen, S.B., and  
972 Steinberg, G.R. (2021). GDF15: emerging biology and therapeutic applications for  
973 obesity and cardiometabolic disease. *Nat Rev Endocrinol* 17, 592–607.  
974 10.1038/s41574-021-00529-7.
- 975 34. Suriben, R., Chen, M., Higbee, J., Oeffinger, J., Ventura, R., Li, B., Mondal, K., Gao,  
976 Z., Ayupova, D., Taskar, P., et al. (2020). Antibody-mediated inhibition of GDF15-  
977 GFRAL activity reverses cancer cachexia in mice. *Nat Med* 26, 1264–1270.  
978 10.1038/s41591-020-0945-x.
- 979 35. Mittenbühler, M.J., Jedrychowski, M.P., Van Vranken, J.G., Sprenger, H.-G.,  
980 Wilensky, S., Dumesic, P.A., Sun, Y., Tartaglia, A., Bogoslavski, D., A, M., et al.  
981 (2023). Isolation of extracellular fluids reveals novel secreted bioactive proteins from  
982 muscle and fat tissues. *Cell Metab* 35, 535-549.e7. 10.1016/j.cmet.2022.12.014.
- 983 36. Xu, J., Kimball, T.R., Lorenz, J.N., Brown, D.A., Bauskin, A.R., Klevitsky, R., Hewett,  
984 T.E., Breit, S.N., and Molkentin, J.D. (2006). GDF15/MIC-1 functions as a protective  
985 and antihypertrophic factor released from the myocardium in association with SMAD  
986 protein activation. *Circ Res* 98, 342–350. 10.1161/01.RES.0000202804.84885.d0.
- 987 37. Chaffin, M., Papangeli, I., Simonson, B., Akkad, A.-D., Hill, M.C., Arduini, A.,  
988 Fleming, S.J., Melanson, M., Hayat, S., Kost-Alimova, M., et al. (2022). Single-  
989 nucleus profiling of human dilated and hypertrophic cardiomyopathy. *Nature* 608,  
990 174–180. 10.1038/s41586-022-04817-8.
- 991 38. Lachmann, A., Torre, D., Keenan, A.B., Jagodnik, K.M., Lee, H.J., Wang, L.,  
992 Silverstein, M.C., and Ma'ayan, A. (2018). Massive mining of publicly available RNA-  
993 seq data from human and mouse. *Nat Commun* 9, 1366. 10.1038/s41467-018-  
994 03751-6.
- 995 39. Rochette, L., Dogon, G., Zeller, M., Cottin, Y., and Vergely, C. (2021). GDF15 and  
996 Cardiac Cells: Current Concepts and New Insights. *Int J Mol Sci* 22, 8889.  
997 10.3390/ijms22168889.
- 998 40. Ozcan, M., Guo, Z., Valenzuela Ripoll, C., Diab, A., Picataggi, A., Rawnsley, D.,  
999 Lotfinaghsh, A., Bergom, C., Szymanski, J., Hwang, D., et al. (2023). Sustained  
1000 alternate-day fasting potentiates doxorubicin cardiotoxicity. *Cell Metab* 35, 928-  
1001 942.e4. 10.1016/j.cmet.2023.02.006.

- 1002 41. Kärkkäinen, O., Tuomainen, T., Mutikainen, M., Lehtonen, M., Ruas, J.L.,  
1003 Hanhineva, K., and Tavi, P. (2019). Heart specific PGC-1 $\alpha$  deletion identifies  
1004 metabolome of cardiac restricted metabolic heart failure. *Cardiovasc Res* 115, 107–  
1005 118. 10.1093/cvr/cvy155.
- 1006 42. Naumenko, N., Mutikainen, M., Holappa, L., Ruas, J.L., Tuomainen, T., and Tavi, P.  
1007 (2022). PGC-1 $\alpha$  deficiency reveals sex-specific links between cardiac energy  
1008 metabolism and EC-coupling during development of heart failure in mice.  
1009 *Cardiovasc Res* 118, 1520–1534. 10.1093/cvr/cvab188.
- 1010 43. Lerchenmüller, C., Vujic, A., Mittag, S., Wang, A., Rabolli, C.P., Heß, C., Betge, F.,  
1011 Rangrez, A.Y., Chaklader, M., Guillermier, C., et al. (2022). Restoration of  
1012 Cardiomyogenesis in Aged Mouse Hearts by Voluntary Exercise. *Circulation* 146,  
1013 412–426. 10.1161/CIRCULATIONAHA.121.057276.
- 1014



**Figure 1**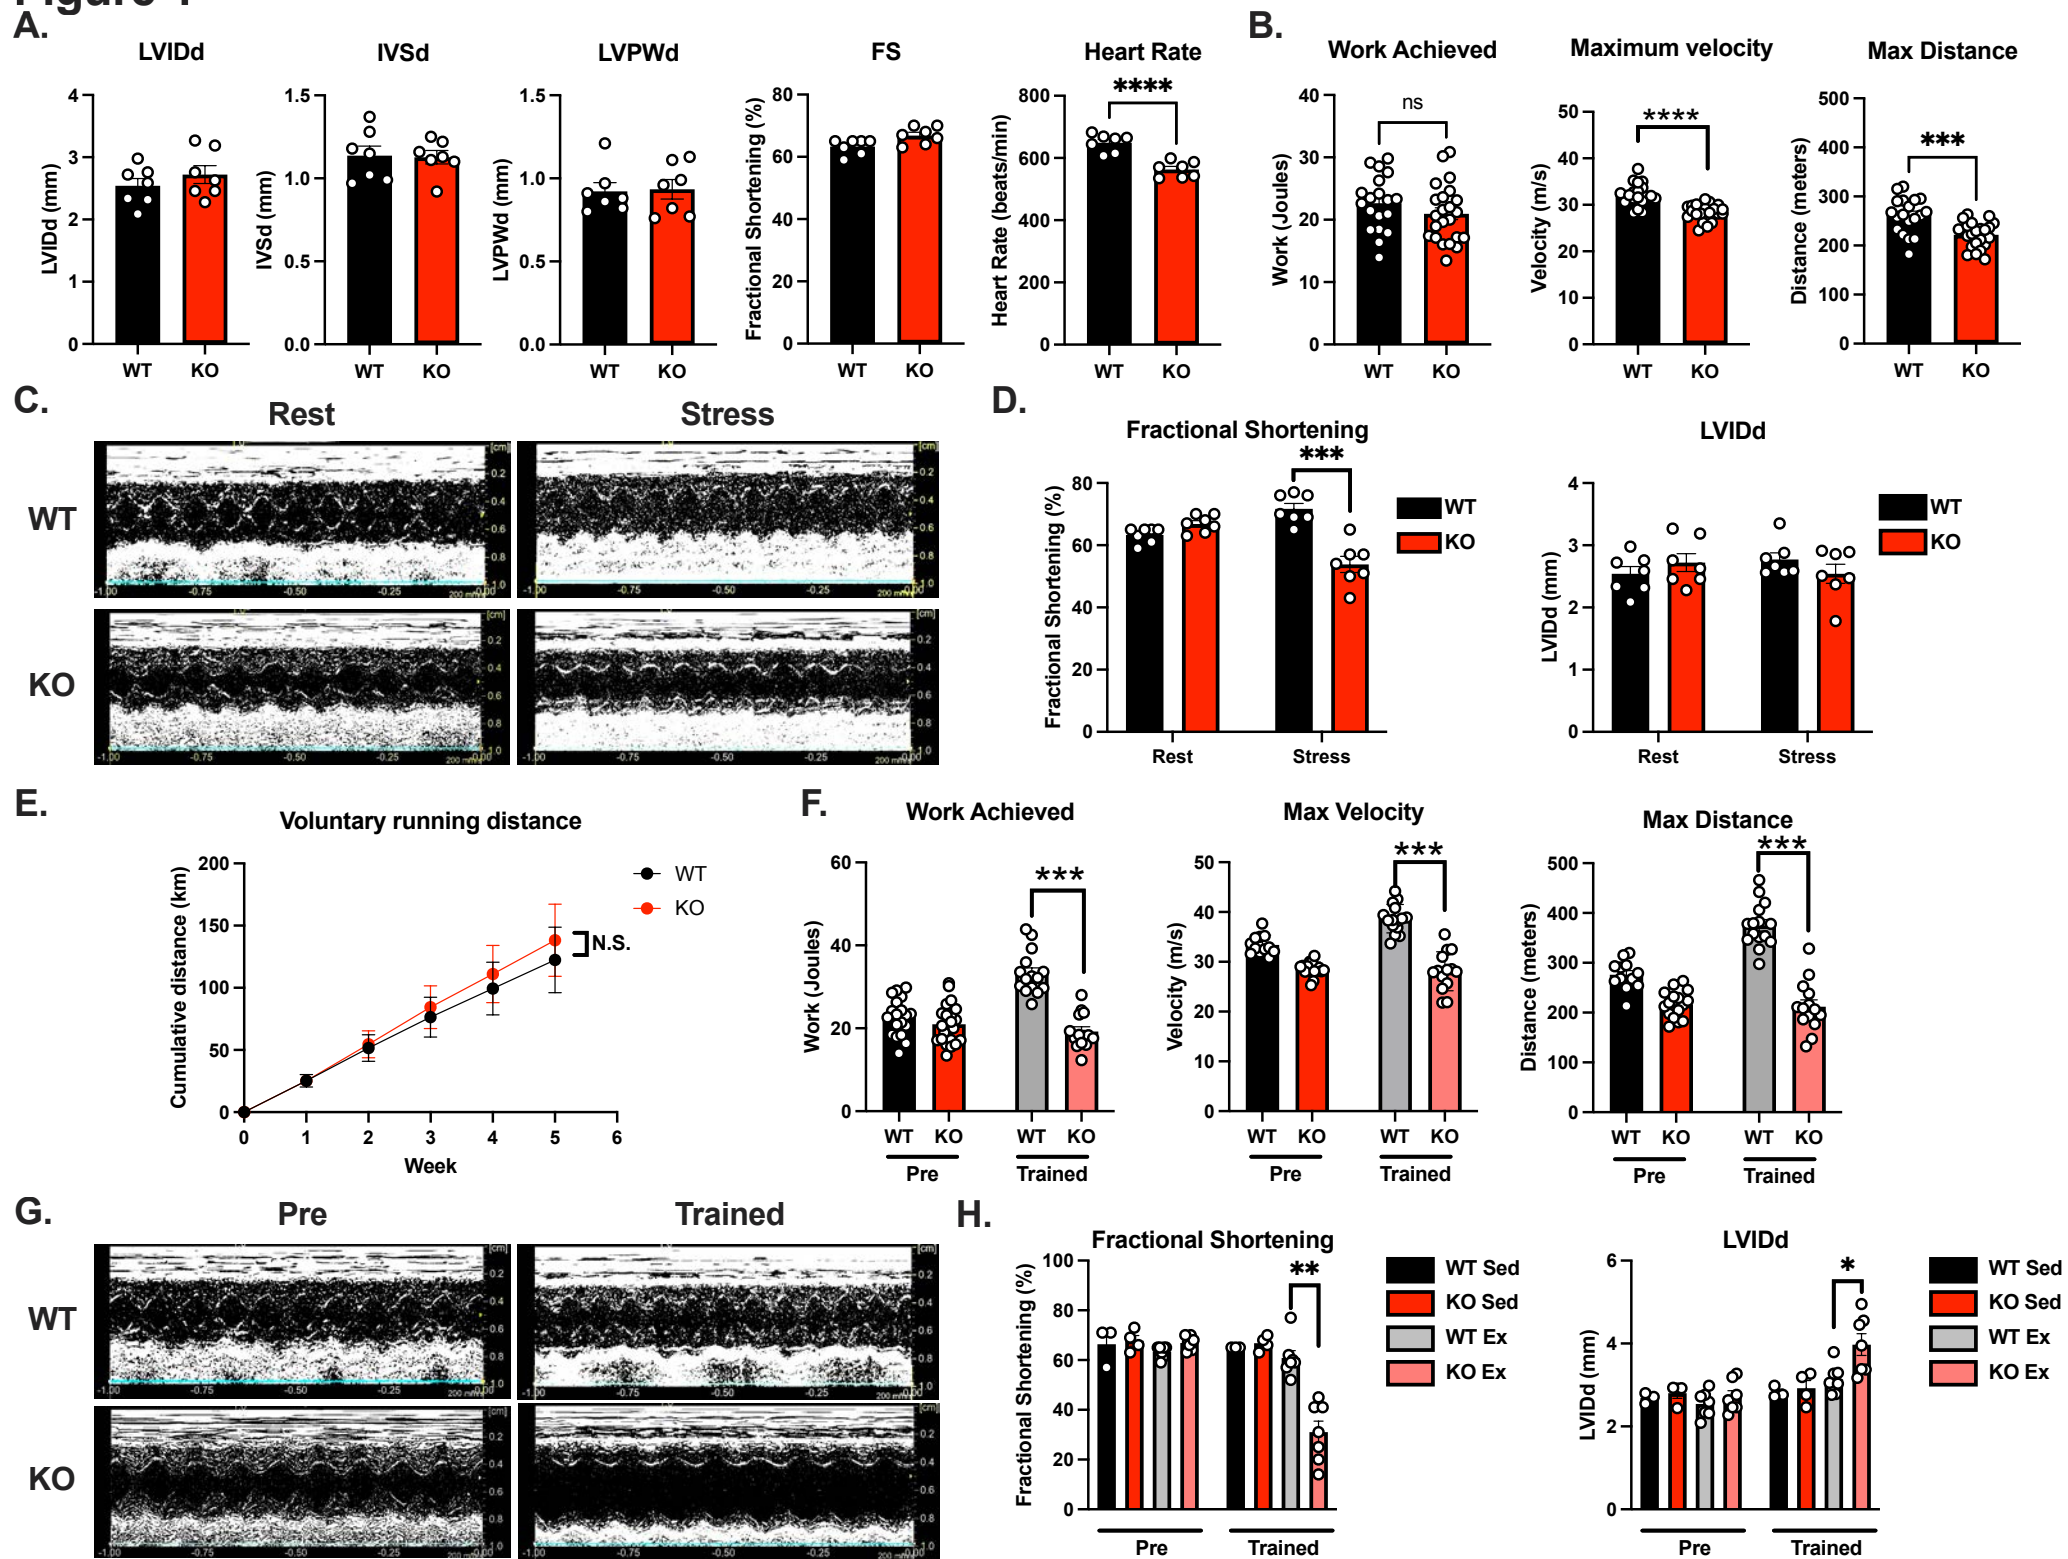

# Figure 2

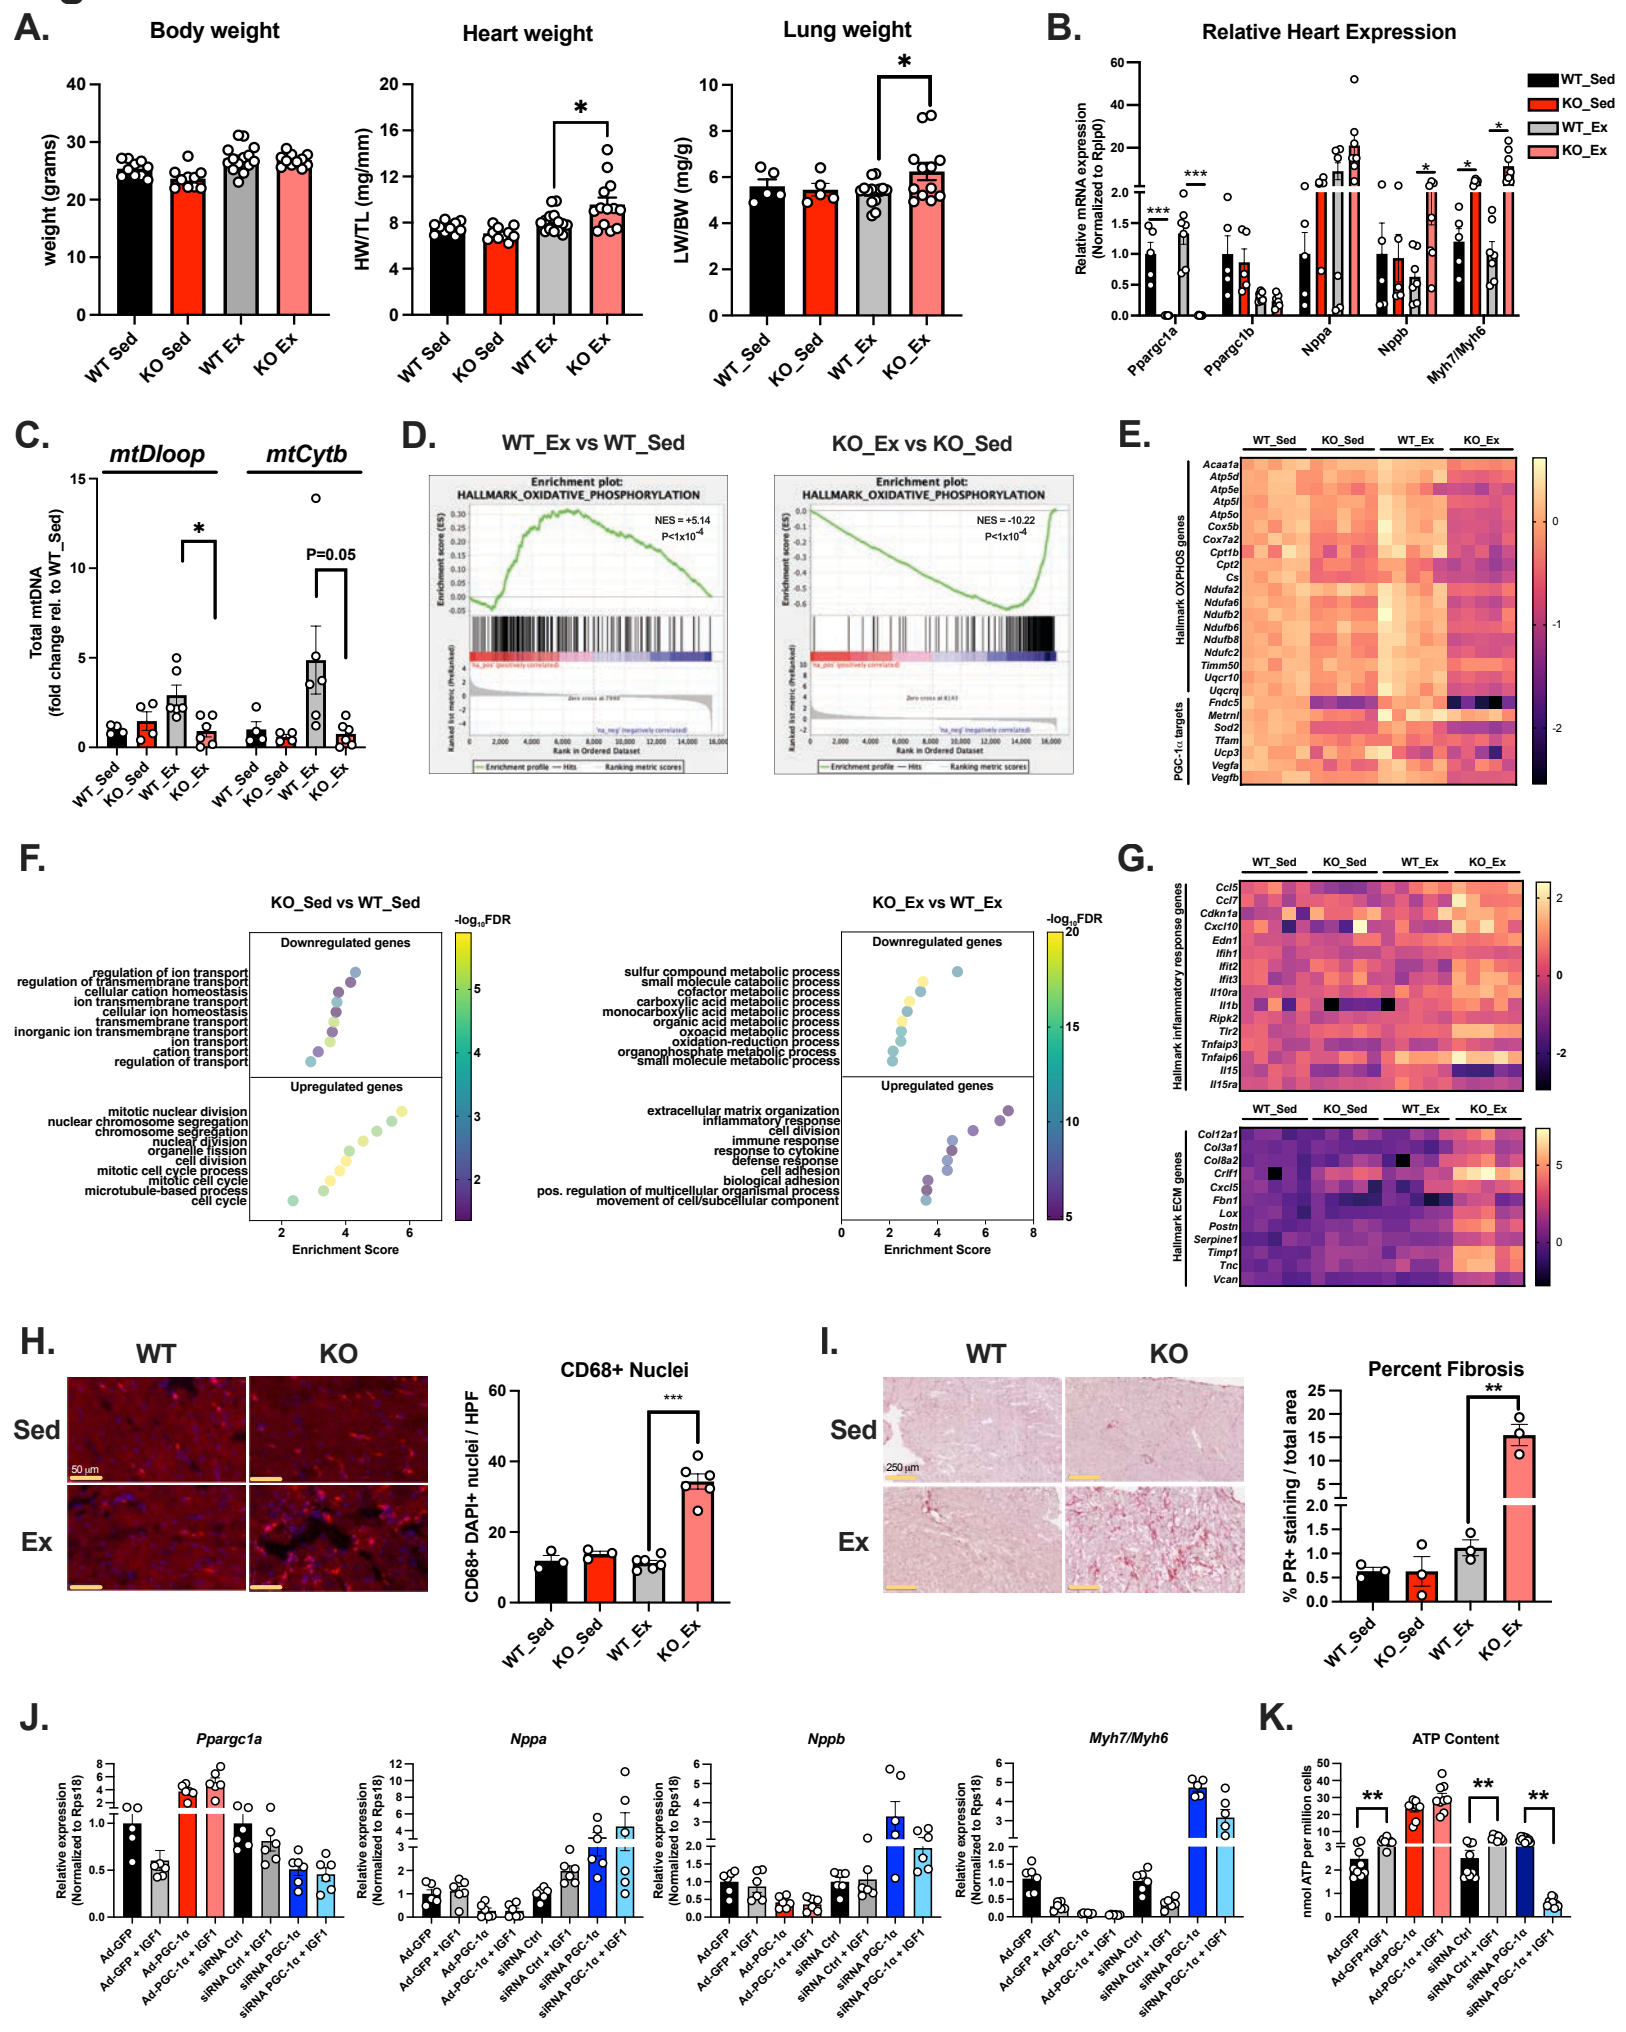

# Figure 3

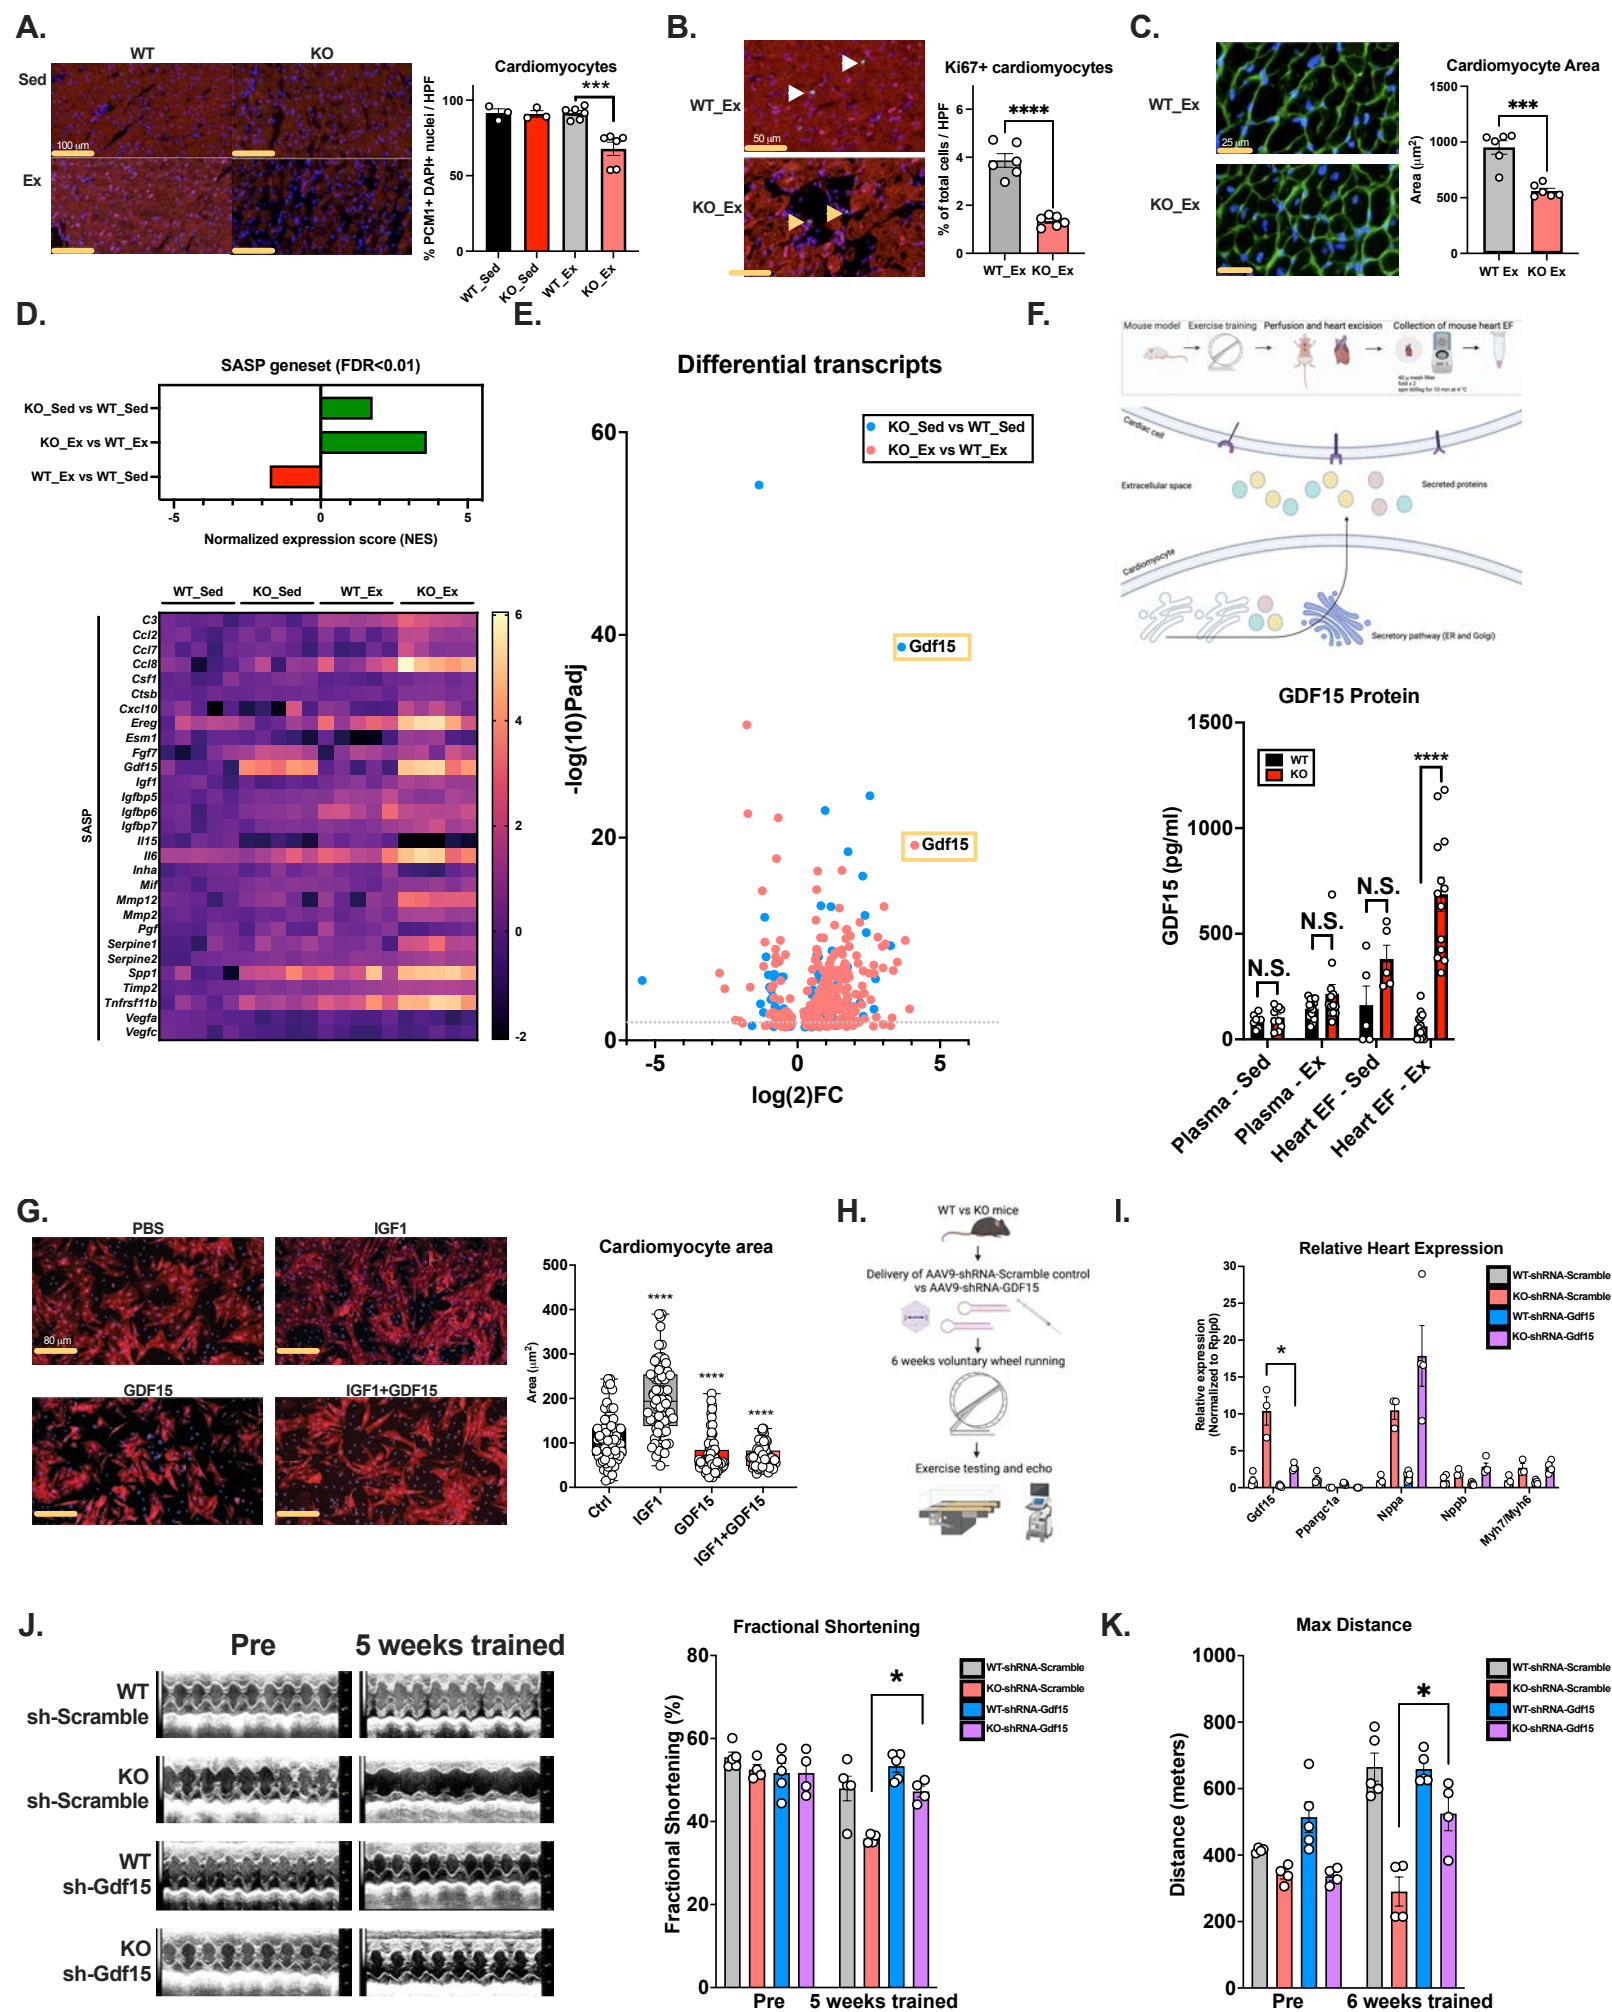

# Figure 4

A.

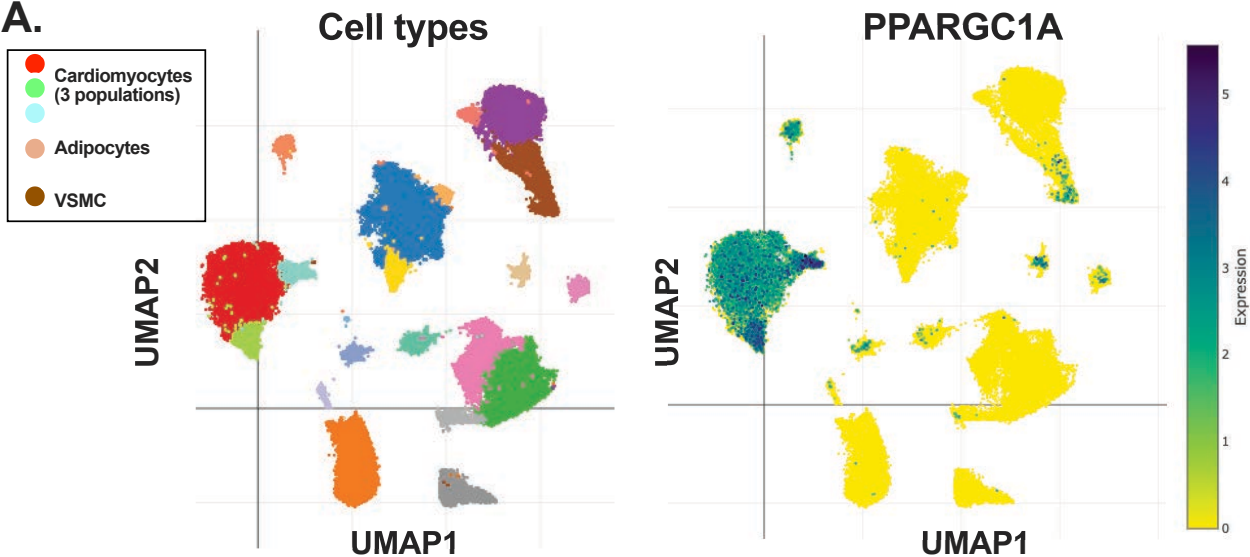

B.

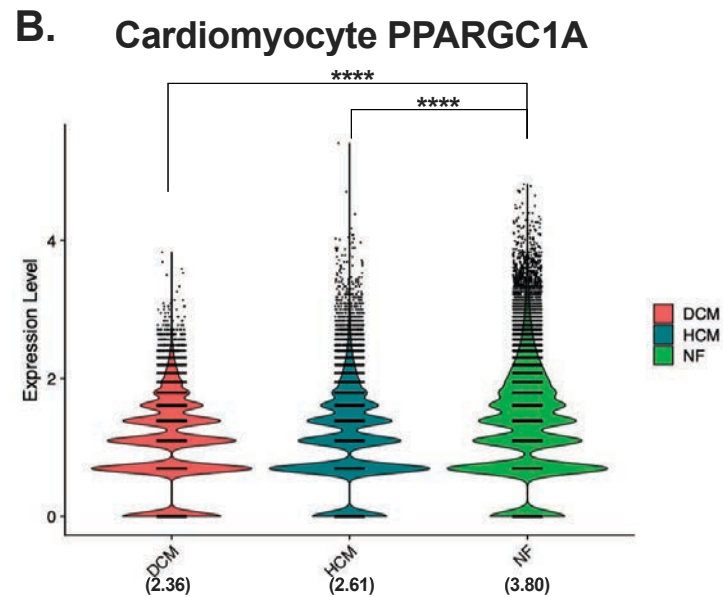

C.

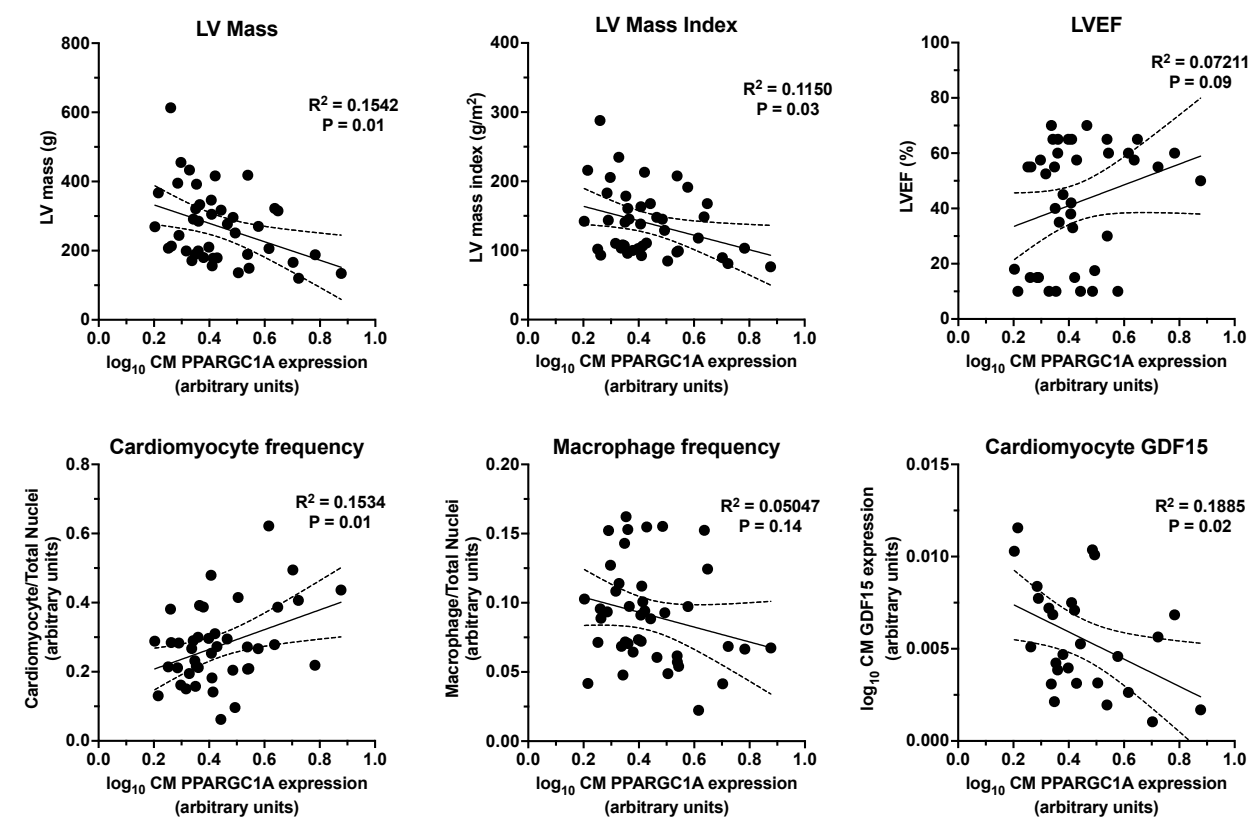

D.

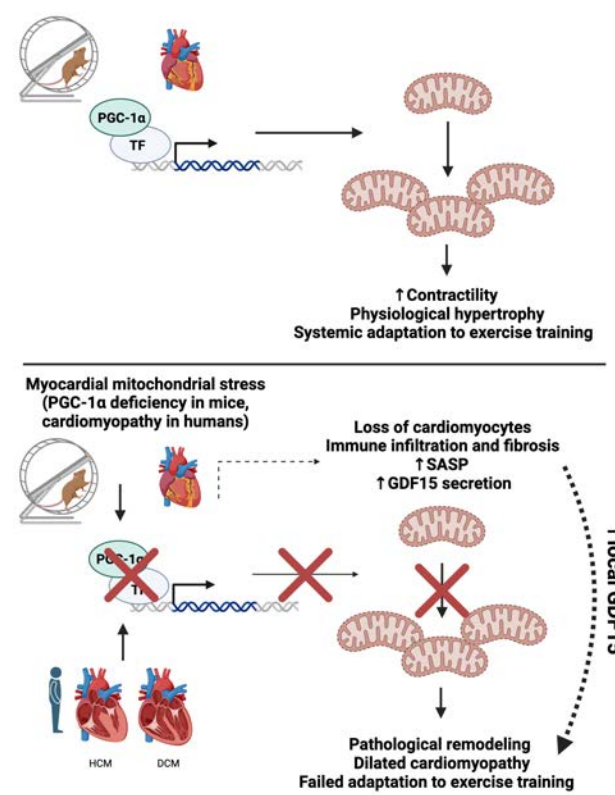

# Figure S1

**A.**

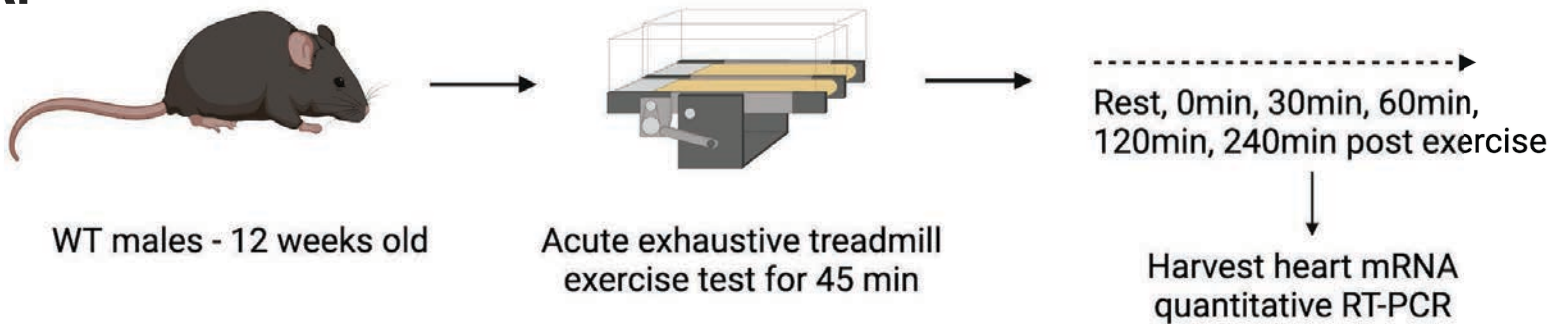

**B.**

*Ppargc1a*

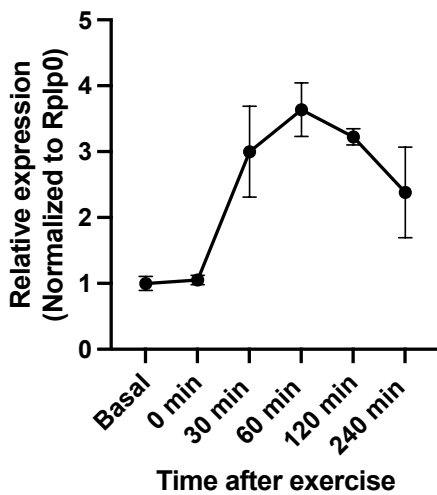

**C.**

NT-PGC-1 $\alpha$

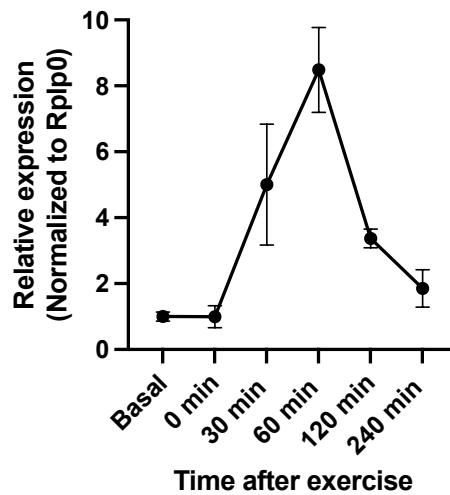

**D.**

*Ppargc1b*

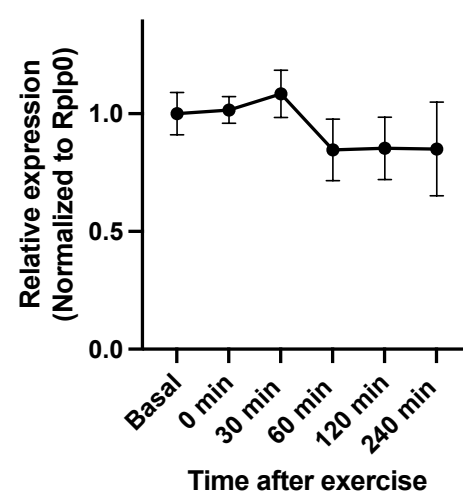

**E.**

*Cebpb*

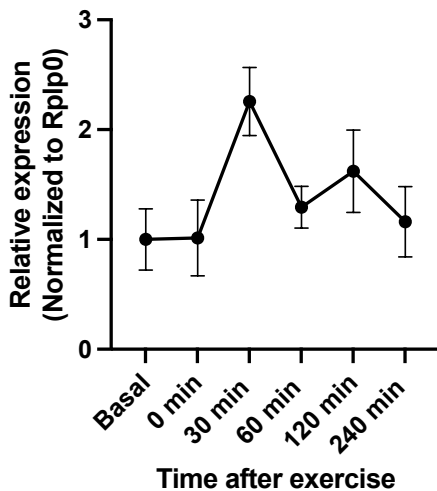

**F.**

*Nppa*

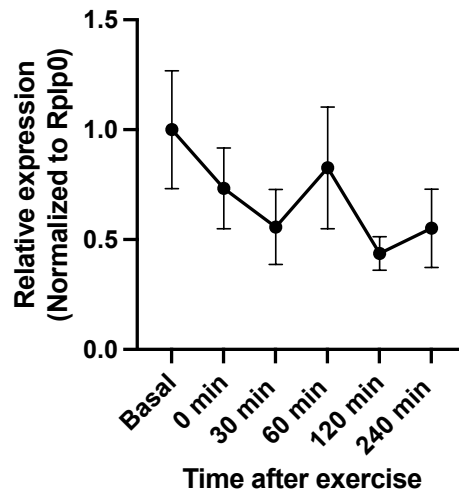

**G.**

*Nppb*

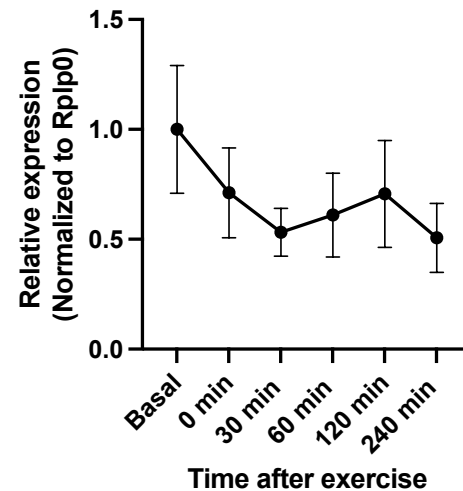

# Figure S2

## A.

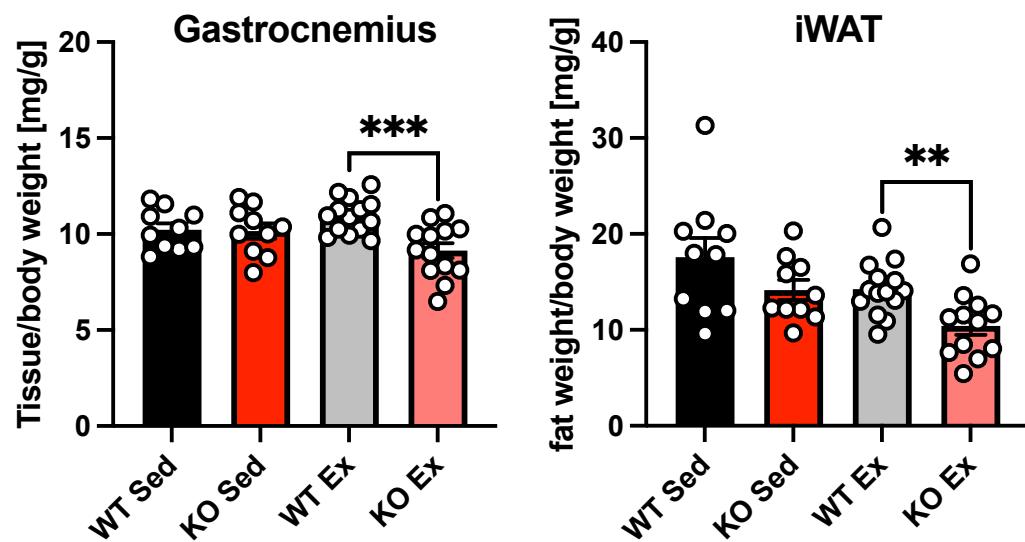

## B.

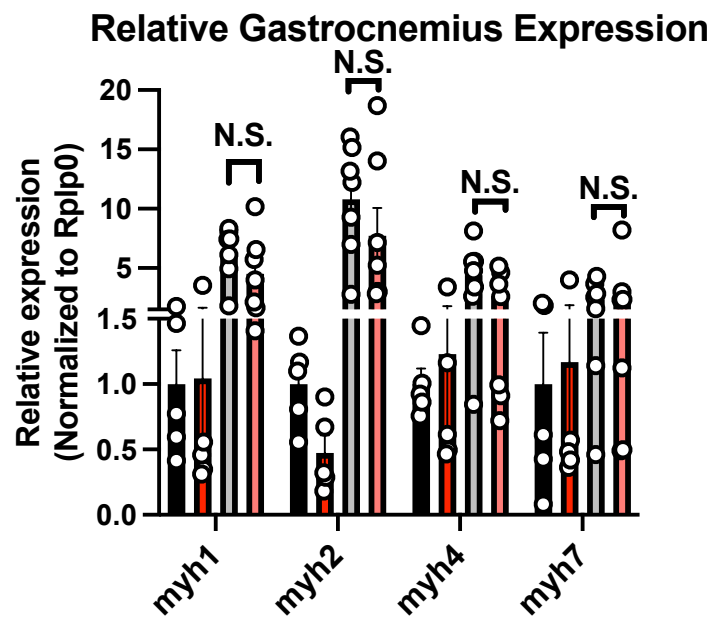

## C.

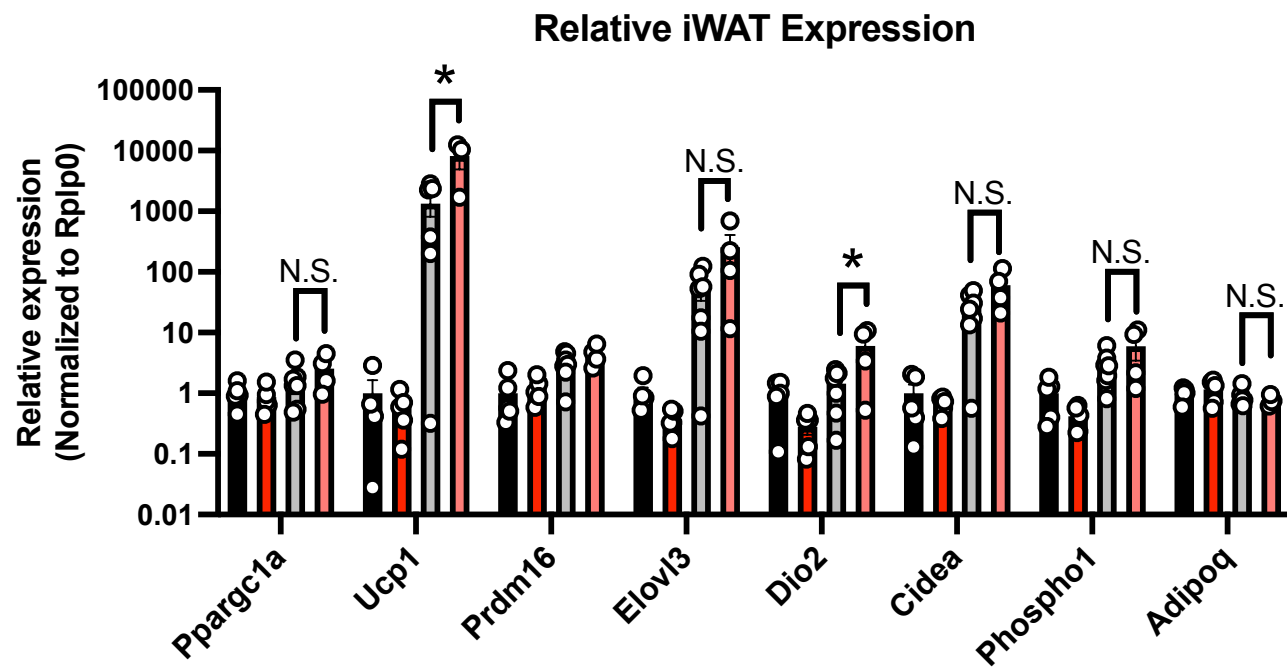

# Figure S3

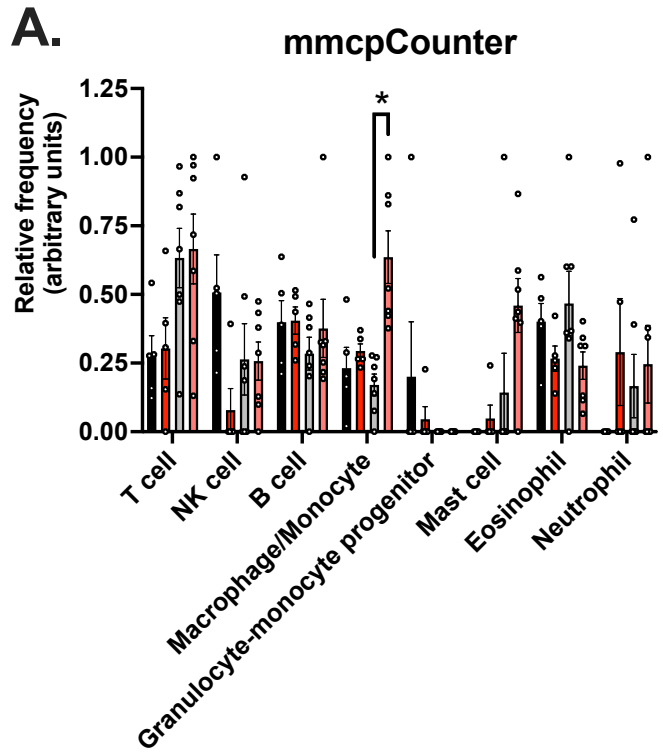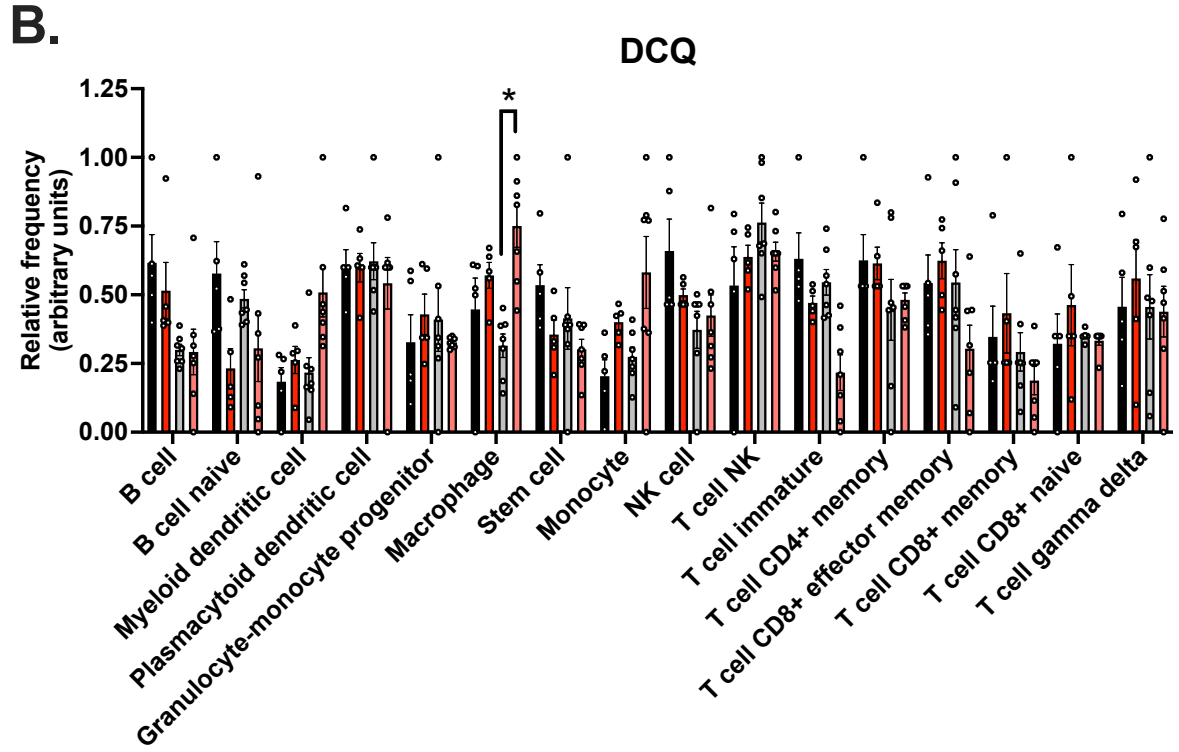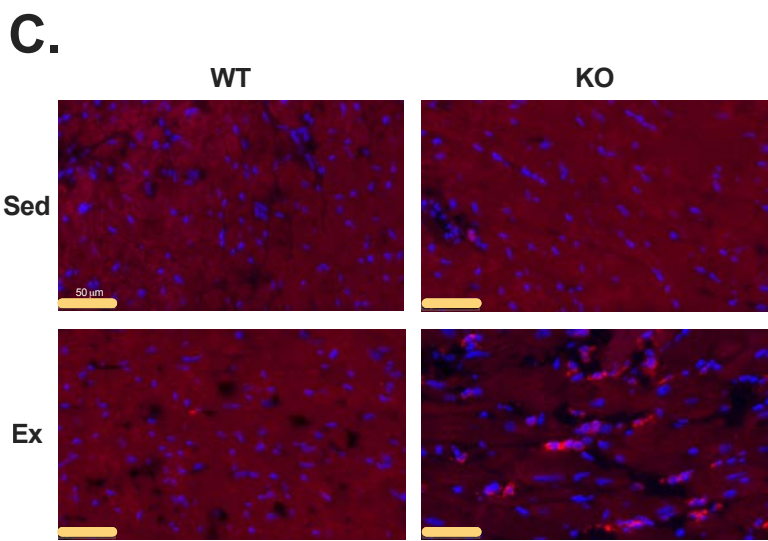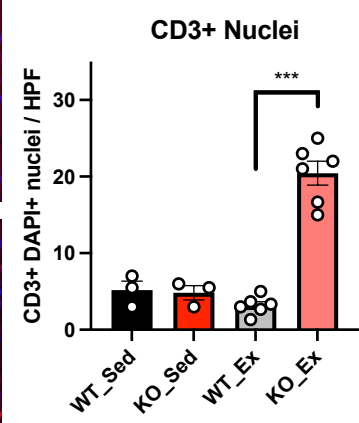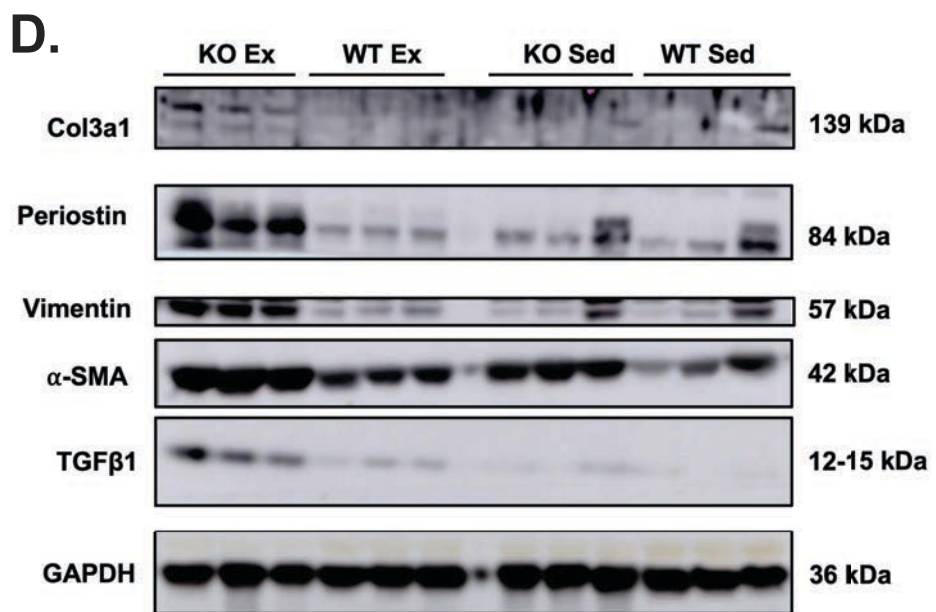

# Figure S4

A.

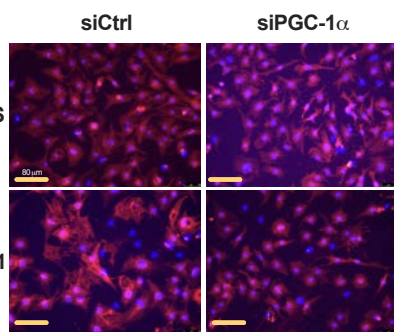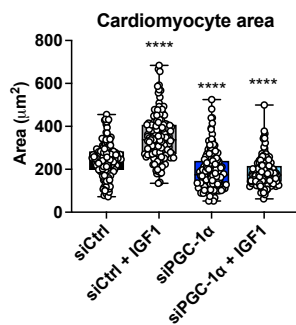

B.

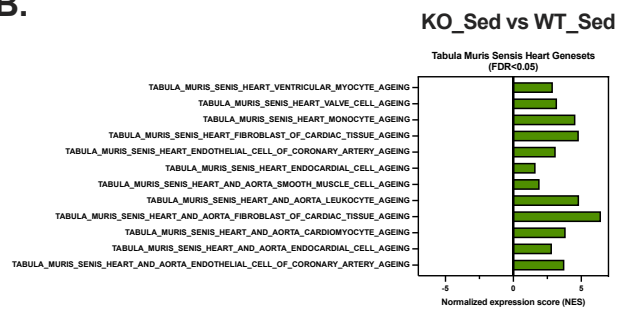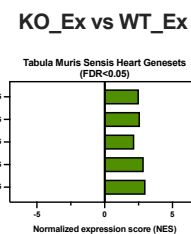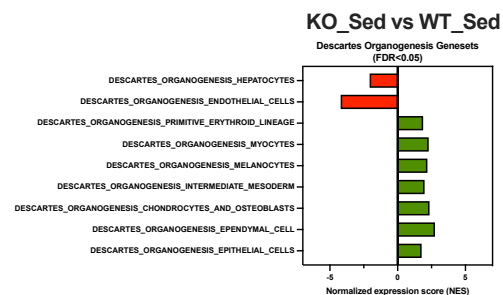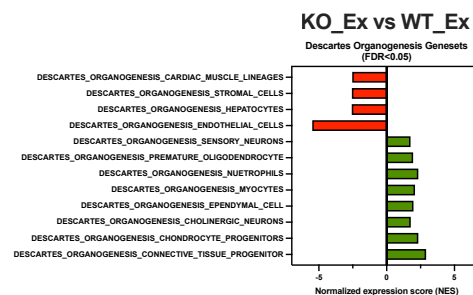

C.

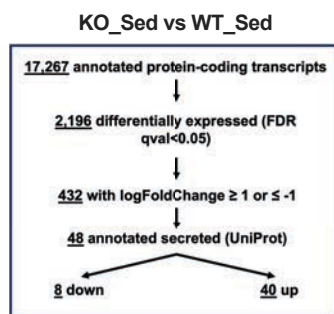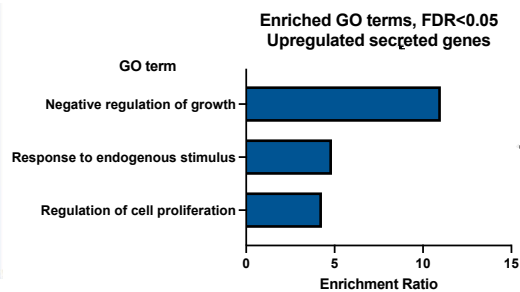

D.

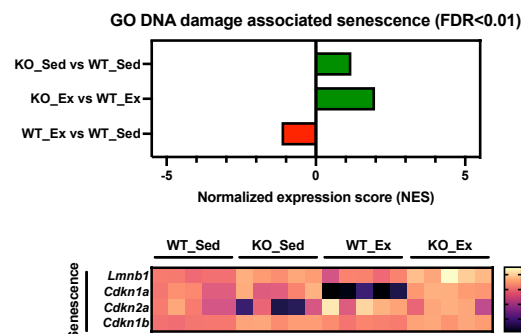

E.

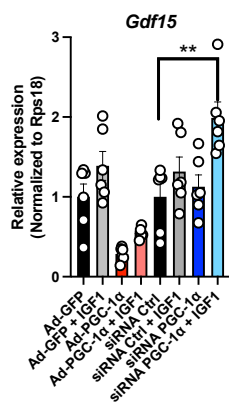

F.

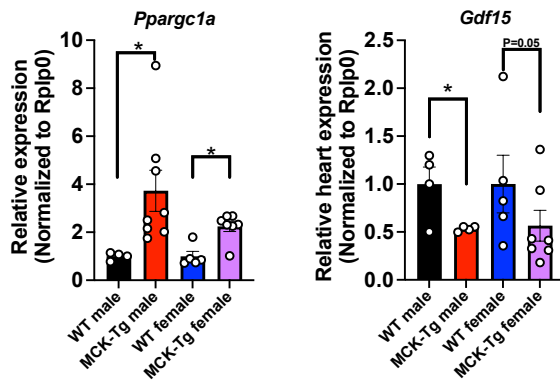



# Figure S5

A.

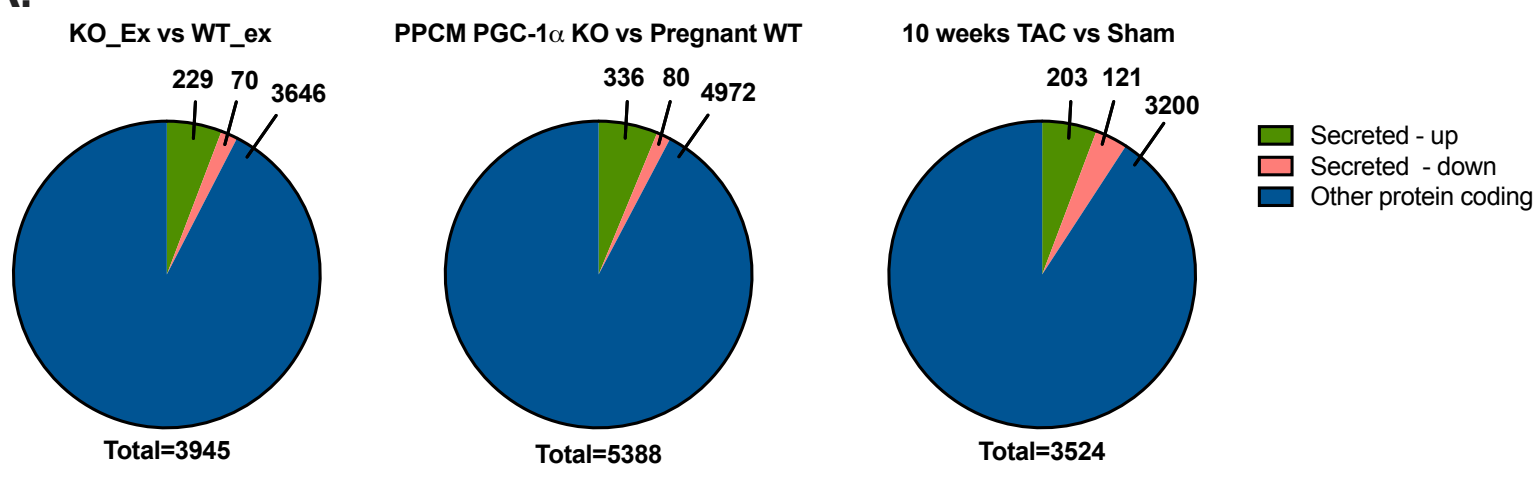

B.

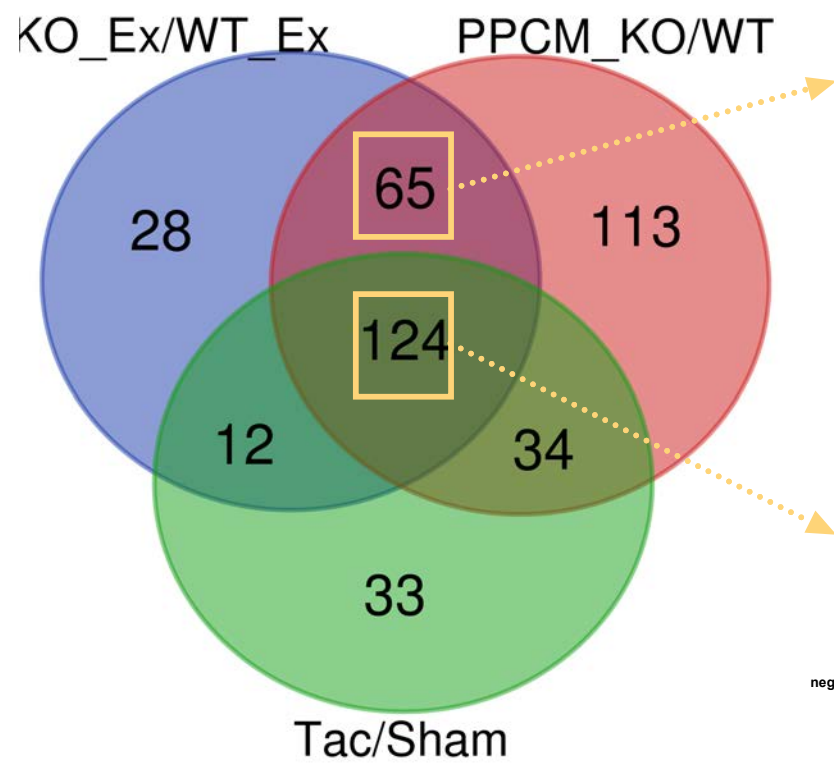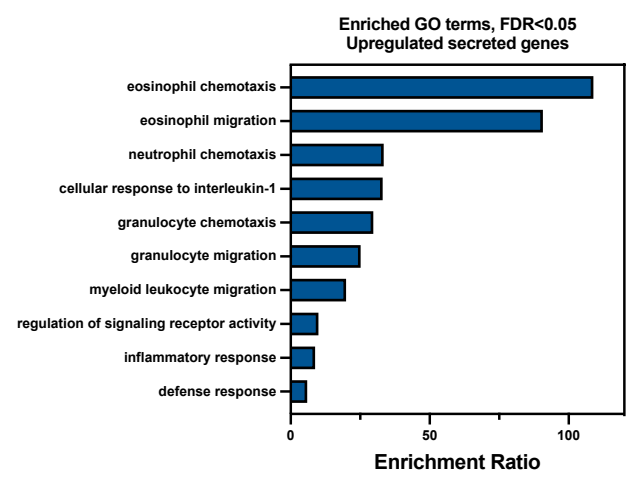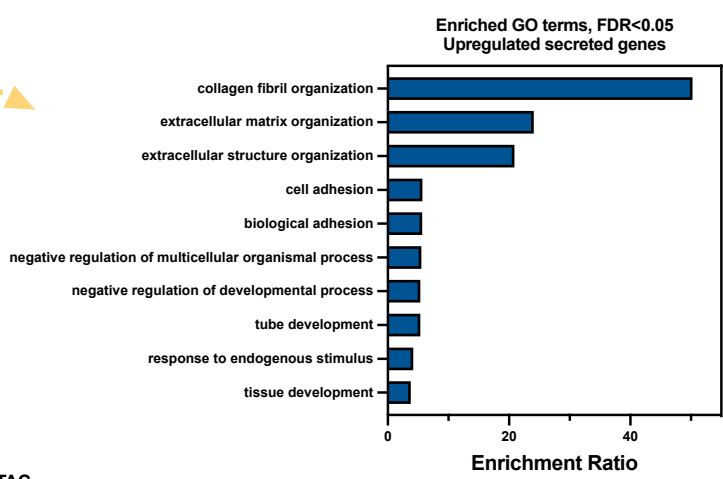

C.

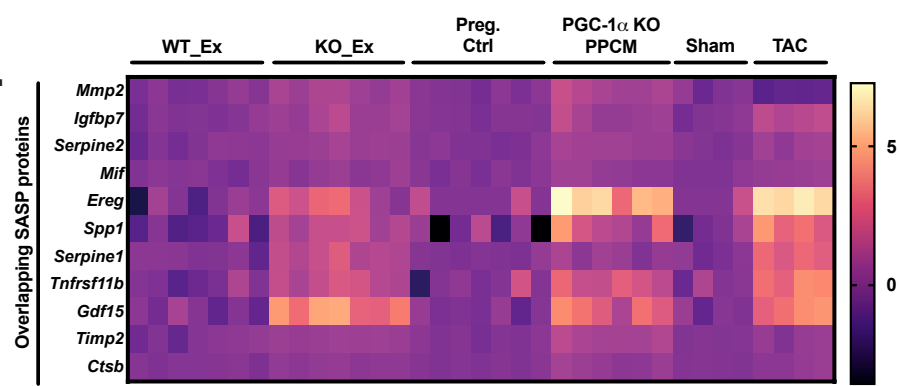

# Figure S6

## A. All tissues

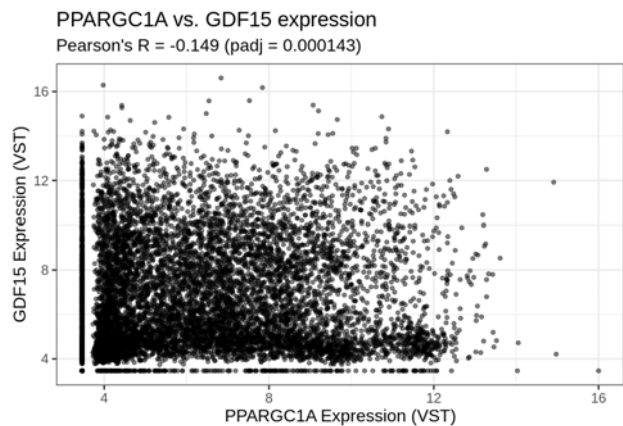

## B. Heart

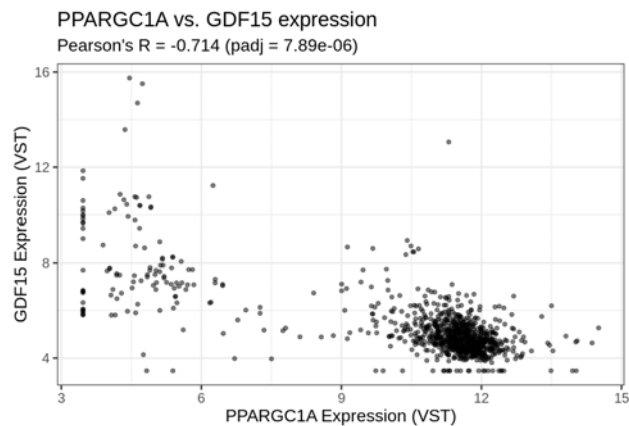

## C. Kidney

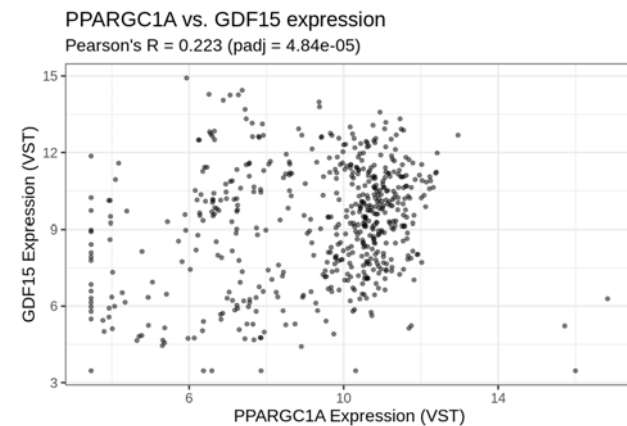

## D. Muscle

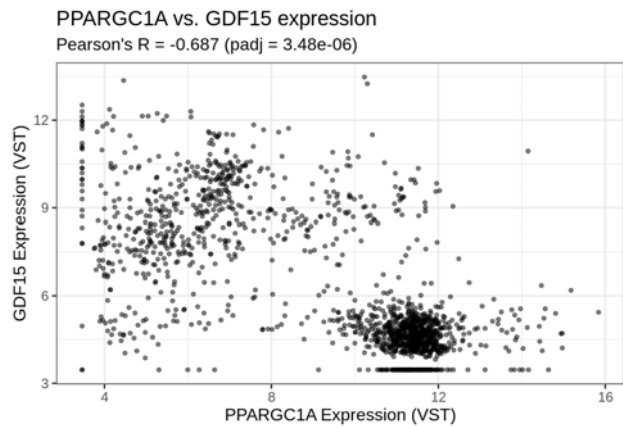

## E. Adipose

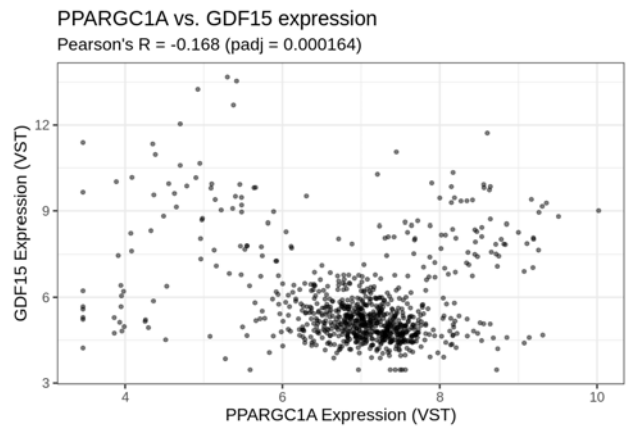

## F. Liver

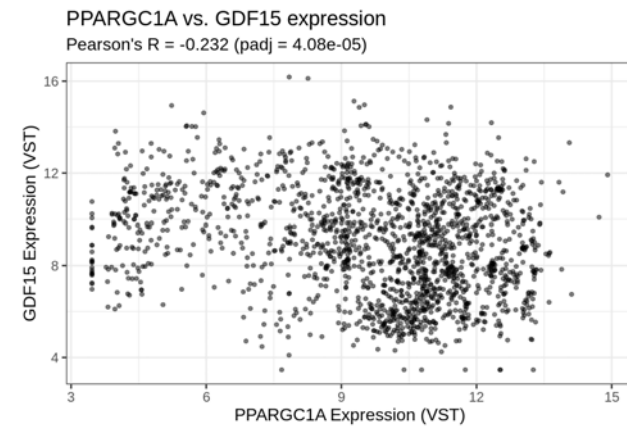

Source: https://www.biorxiv.org/content/biorxiv/early/2024/02/02/2024.01.30.578093.full.pdf
